# Supplementary material
Source: Research Square preprint supplement (doi:10.21203/rs.3.rs-8845746/v1)
Supplement: Supplementary file 1 [file 859919c4acb89249673c6dc1.pdf]

# Supplementary Material: Validation of turbulence models for predicting pressure coefficients for natural ventilation purposes on an isolated low-rise building.

Ángel Sánchez-Cruz<sup>a</sup>, Eduardo Ramos<sup>a</sup>, Edmundo Amaya-Gallardo<sup>b</sup>,  
Vladimir Arturo Reyes Herrera<sup>a</sup>, Saul Piedra<sup>c</sup>

<sup>a</sup>*Renewable Energy Institute, Universidad Nacional Autónoma de México (UNAM), Temixco, Mor., 62580, Mexico*

<sup>b</sup>*Civil Engineering Faculty, Universidad Autónoma de Coahuila (UAdeC), Torreón, Coah., 27275, Mexico*

<sup>c</sup>*SECIHTI - Centro de Ingeniería y Desarrollo Industrial, Querétaro, Qro., 76125, Mexico*

---

## Abstract

This document is the supplementary material for the article titled “Validation of turbulence models for representing pressure coefficients for natural ventilation purposes on an isolated low-rise building”. It provides further validation and analysis of turbulence models used to represent the pressure coefficients ( $C_P$ ) on an isolated low-rise building, with the goal of assessing their applicability in natural ventilation design.

The validation includes velocity and turbulence profiles within a computational domain without any building structure, demonstrating that the velocity profiles ( $U$ ) and turbulence variables ( $I$ ,  $k$ ,  $\epsilon$ ,  $\omega$ ) remain consistent across the domain. Additionally, contour maps of pressure coefficients on the building faces for various wind incidence angles are presented, obtained from CFD simulations. These results are compared to experimentally derived wall-averaged pressure coefficients.

The document also includes local comparisons of the pressure coefficients obtained from the BDA and TPU databases, with CFD simulations. The accuracy of the turbulence models is assessed through the Normalized Mean Square Error (NMSE) and the Normalized Root Mean Square Error ( $\epsilon$ ). Furthermore, the analysis extends to local pressure coefficients along the

horizontal and vertical centerlines of the building. Turbulent kinetic energy and turbulent viscosity fields are also examined, along with comparisons of flow streamlines for different wind incidence angles.

Overall, this supplementary material provides a comprehensive evaluation of the turbulence models and their effectiveness in predicting pressure coefficients within the context of natural ventilation in buildings.

---

## **1. Validation of Profiles Through Domain, Pressure Coefficient Contour Maps and Qualitative Assessment of Wall-Averaged Pressure Coefficient**

Section 1.1 presents the validation of the velocity and turbulence profiles within the computational domain without building. These profiles were sampled at five distinct points, spanning from the inlet to the outlet of the *empty* domain. The theoretical velocity profile,  $u$ , is plotted to demonstrate that it traverses the domain without perturbations, ensuring that the turbulence profiles,  $I$ ,  $k$ ,  $\epsilon$ , and  $\omega$ , remain consistent throughout.

Section 1.2 presents the contour maps of pressure coefficients on the building faces for atmospheric boundary layer profile incidence angles of  $0^\circ$ ,  $15^\circ$ ,  $30^\circ$ , and  $45^\circ$ , derived from CFD simulations. The contour maps include results obtained using the STD  $k$ - $\epsilon$ , Realizable  $k$ - $\epsilon$ , RNG  $k$ - $\epsilon$ , STD  $k$ - $\omega$ , and SST  $k$ - $\omega$  turbulence models.

Section 1.3 presents a qualitative analysis of the wall-averaged pressure coefficient ( $\overline{C_P}$ ), comparing the CFD results from this study with experimental data.

### 1.1. Velocity and Turbulence Profiles Through Domain

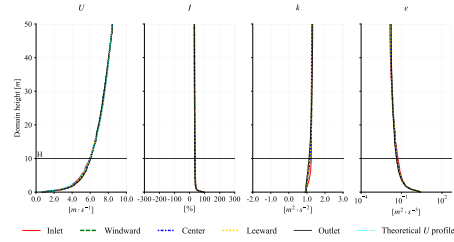

(a)  $0^\circ$

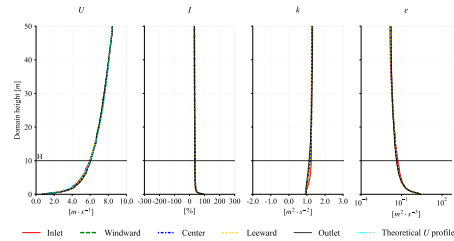

(b)  $15^\circ$

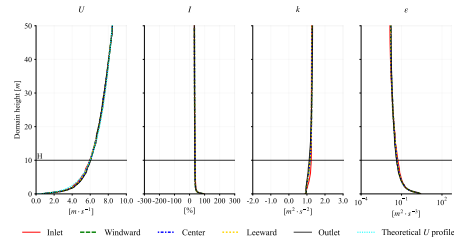

(c)  $30^\circ$

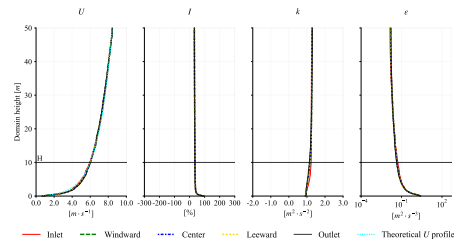

(d)  $45^\circ$

Figure 1: Velocity and turbulent profiles, STD  $k$ - $\epsilon$  for the sampling locations through the domain. Building height ( $H$ ) equals to reference height ( $y_{ref}$ ), for the ABL setup.

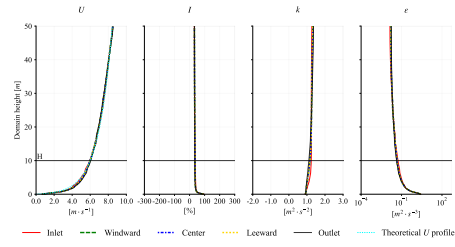

(a)  $0^\circ$

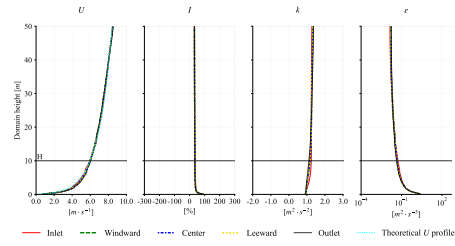

(b)  $15^\circ$

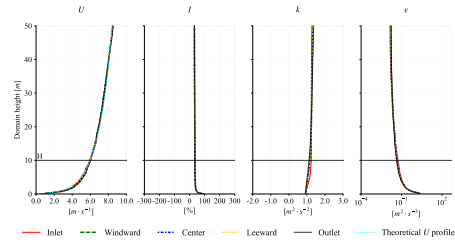

(c)  $30^\circ$

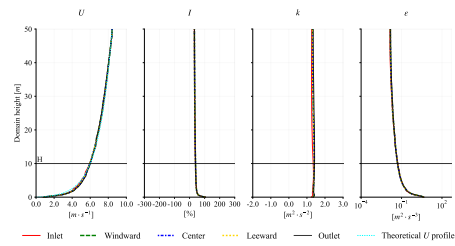

(d)  $45^\circ$

Figure 2: Velocity and turbulent profiles, Realizable  $k$ - $\epsilon$  for the sampling locations through the domain. Building height ( $H$ ) equals to reference height ( $y_{ref}$ ), for the ABL setup.

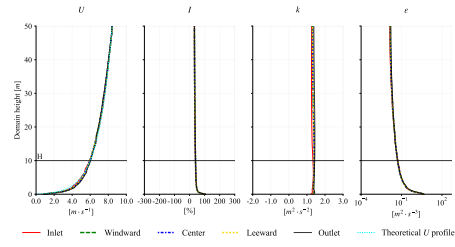

(a)  $0^\circ$

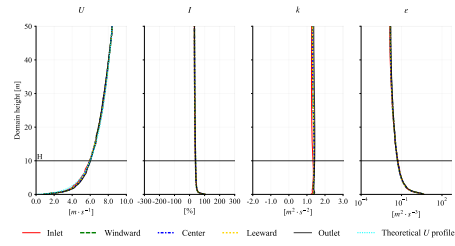

(b)  $15^\circ$

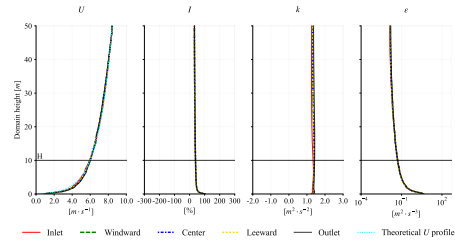

(c)  $30^\circ$



(d)  $45^\circ$

Figure 3: Velocity and turbulent profiles, RNG  $k-\epsilon$  for the sampling locations through the domain. Building height ( $H$ ) equals to reference height ( $y_{ref}$ ), for the ABL setup.

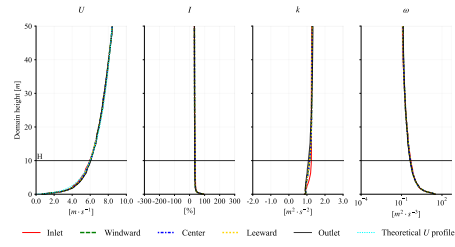

(a)  $0^\circ$

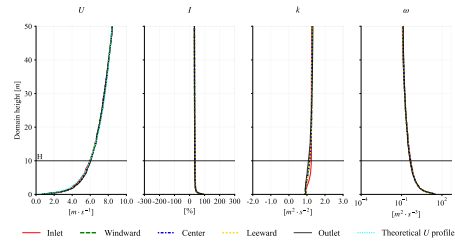

(b)  $15^\circ$

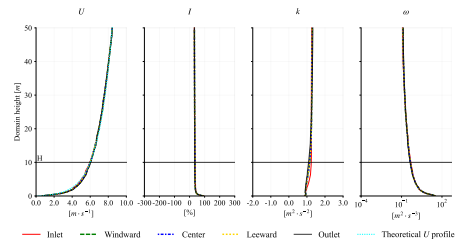

(c)  $30^\circ$

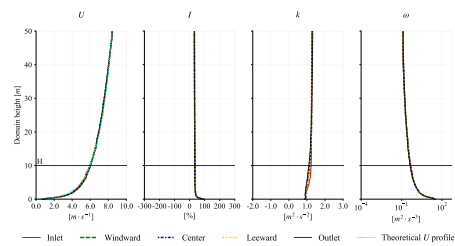

(d)  $45^\circ$

Figure 4: Velocity and turbulent profiles, STD  $k$ - $\omega$  for the sampling locations through the domain. Building height ( $H$ ) equals to reference height ( $y_{ref}$ ), for the ABL setup.

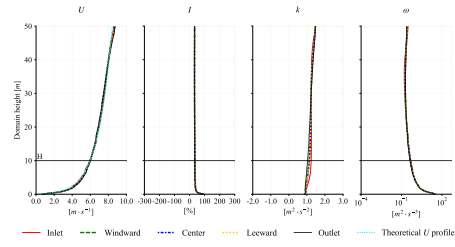

(a)  $0^\circ$

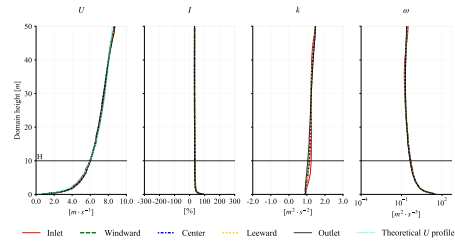

(b)  $15^\circ$

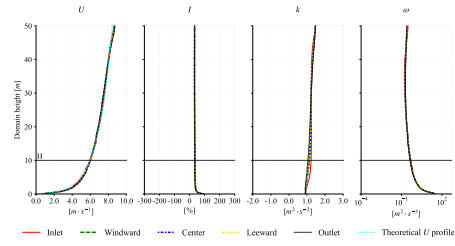

(c)  $30^\circ$

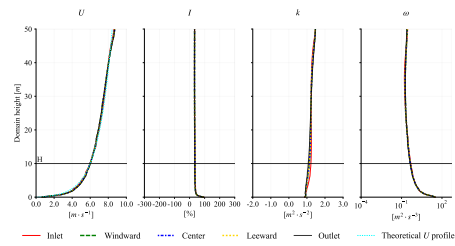

(d)  $45^\circ$

Figure 5: Velocity and turbulent profiles, SST  $k$ - $\omega$  for the sampling locations through the domain. Building height ( $H$ ) equals to reference height ( $y_{ref}$ ), for the ABL setup.

## 1.2. Contour Maps of Pressure Coefficients Derived from CFD Simulations

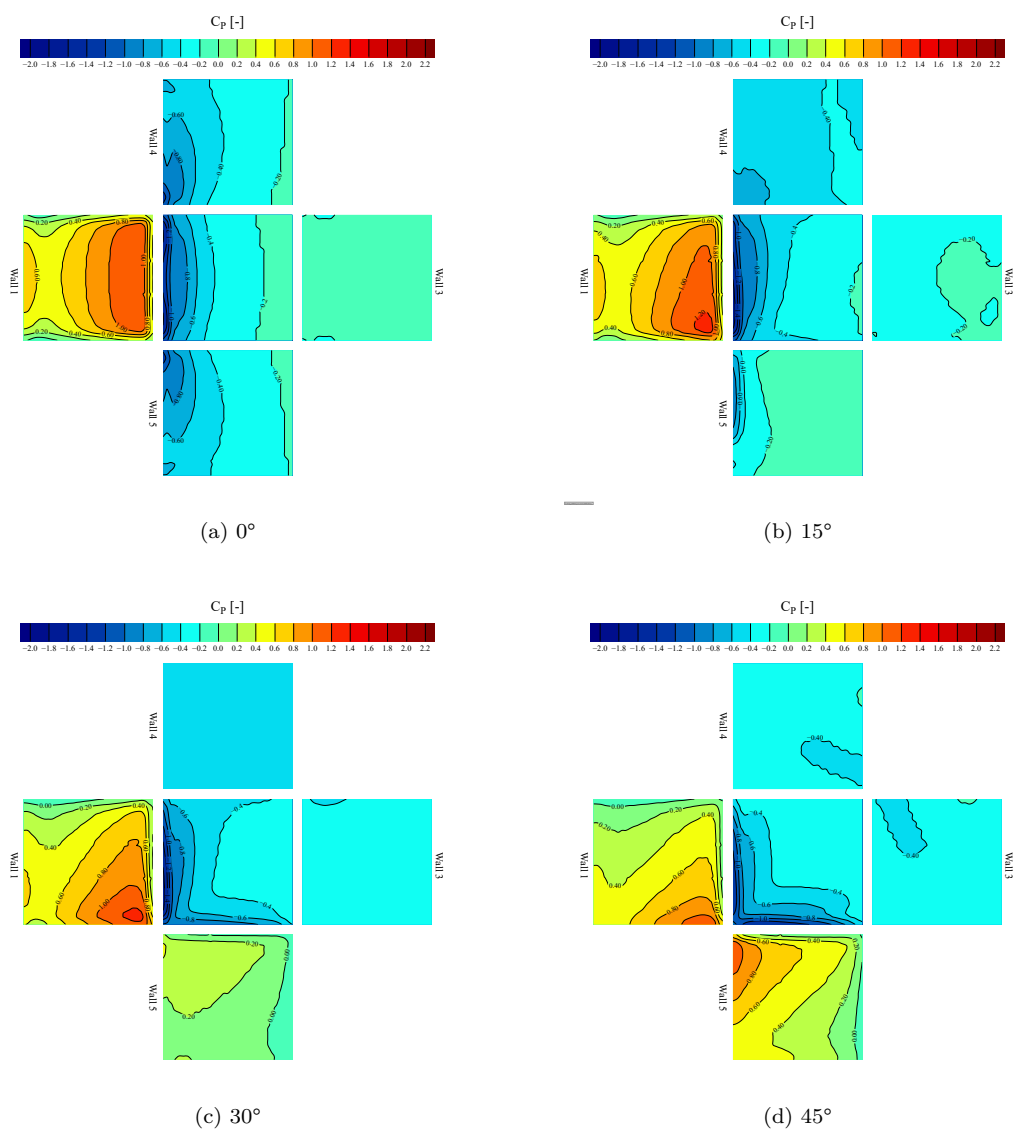

Figure 6:  $C_P$  contour maps, STD  $k-\epsilon$

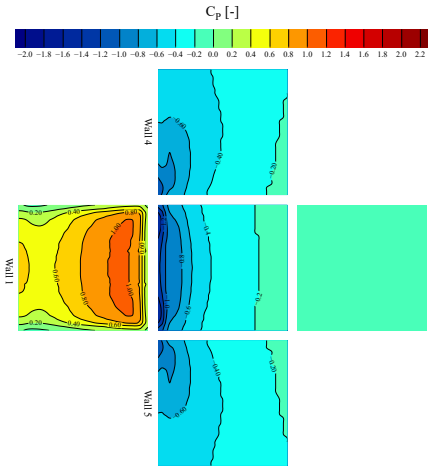

(a) 0°

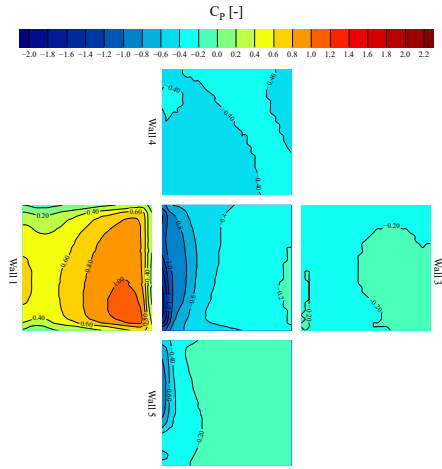

(b) 15°

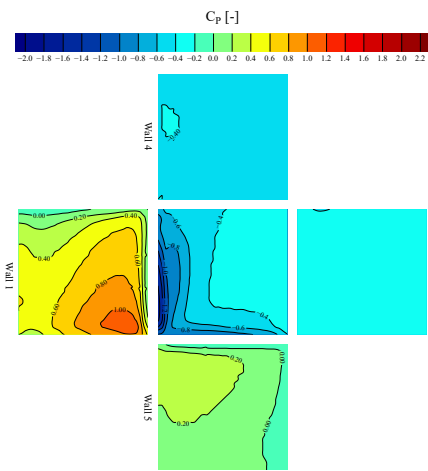

(c) 30°

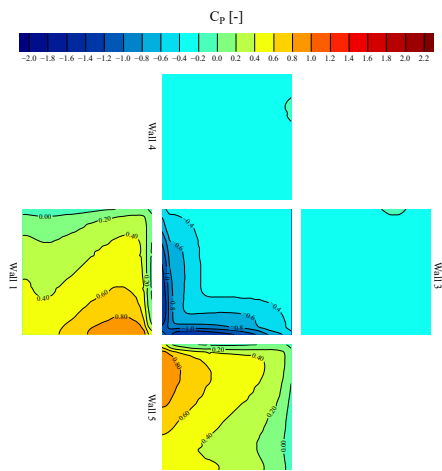

(d) 45°

Figure 7:  $C_P$  contour maps, Realizable  $k-\epsilon$

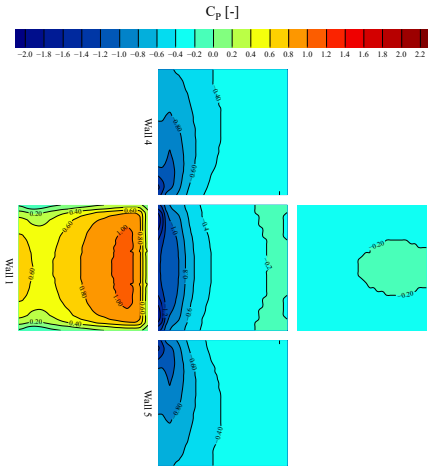

(a)  $0^\circ$

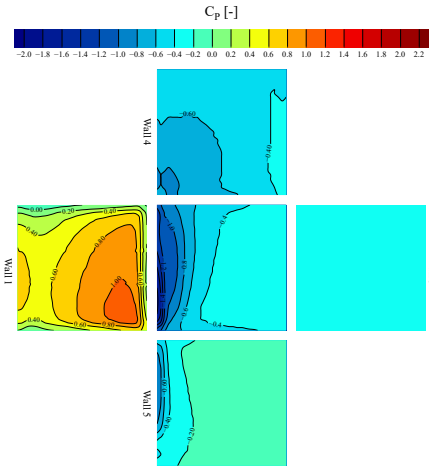

(b)  $15^\circ$

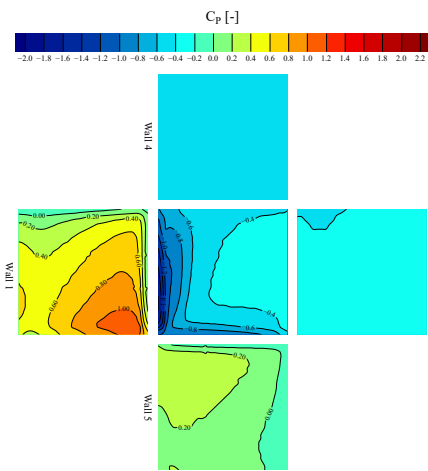

(c)  $30^\circ$

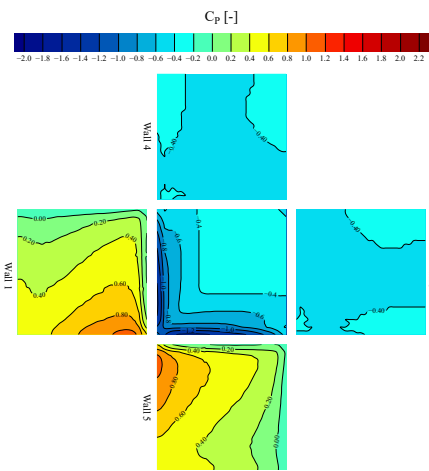

(d)  $45^\circ$

Figure 8:  $C_P$  contour maps, RNG  $k-\epsilon$

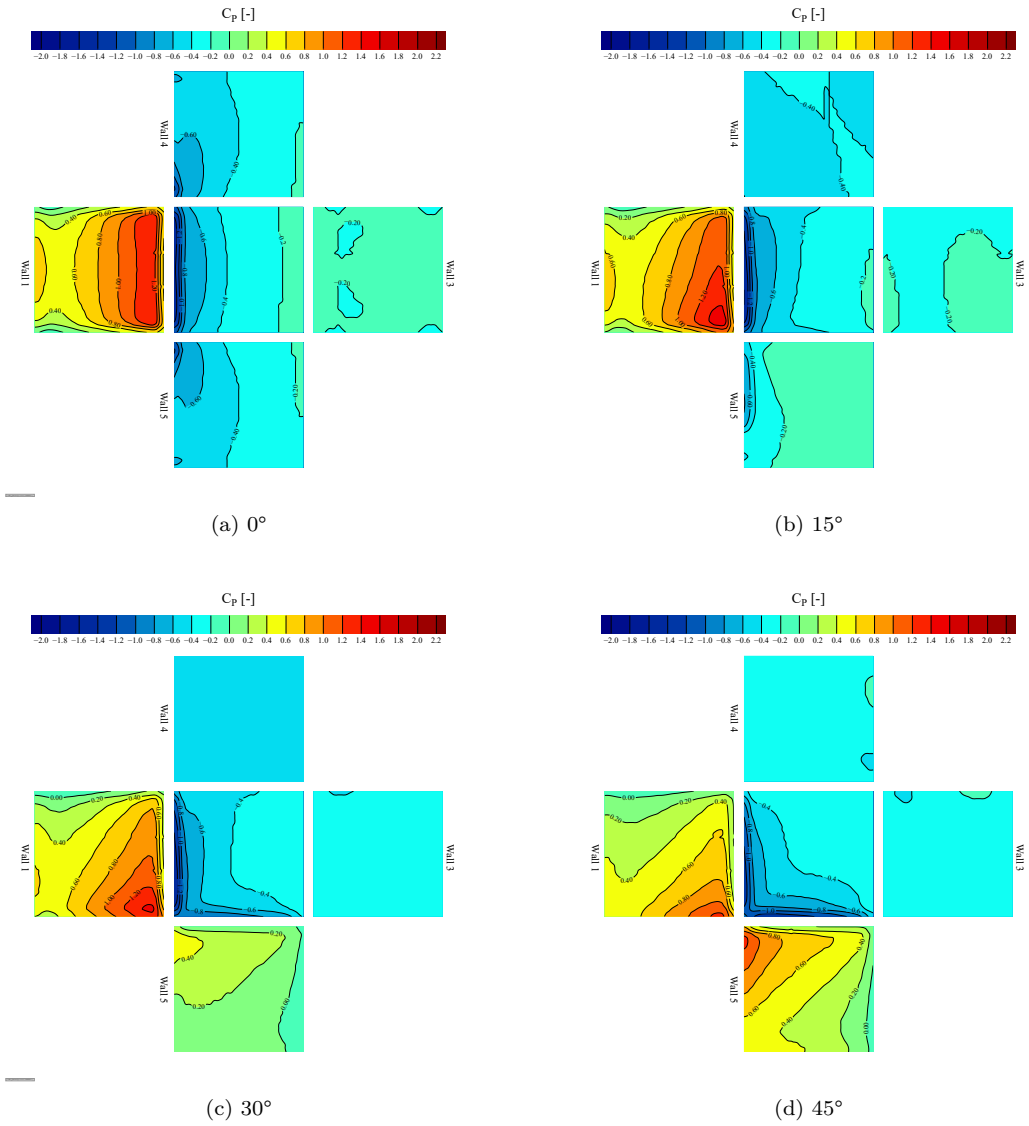

Figure 9:  $C_p$  contour maps, STD  $k-\omega$

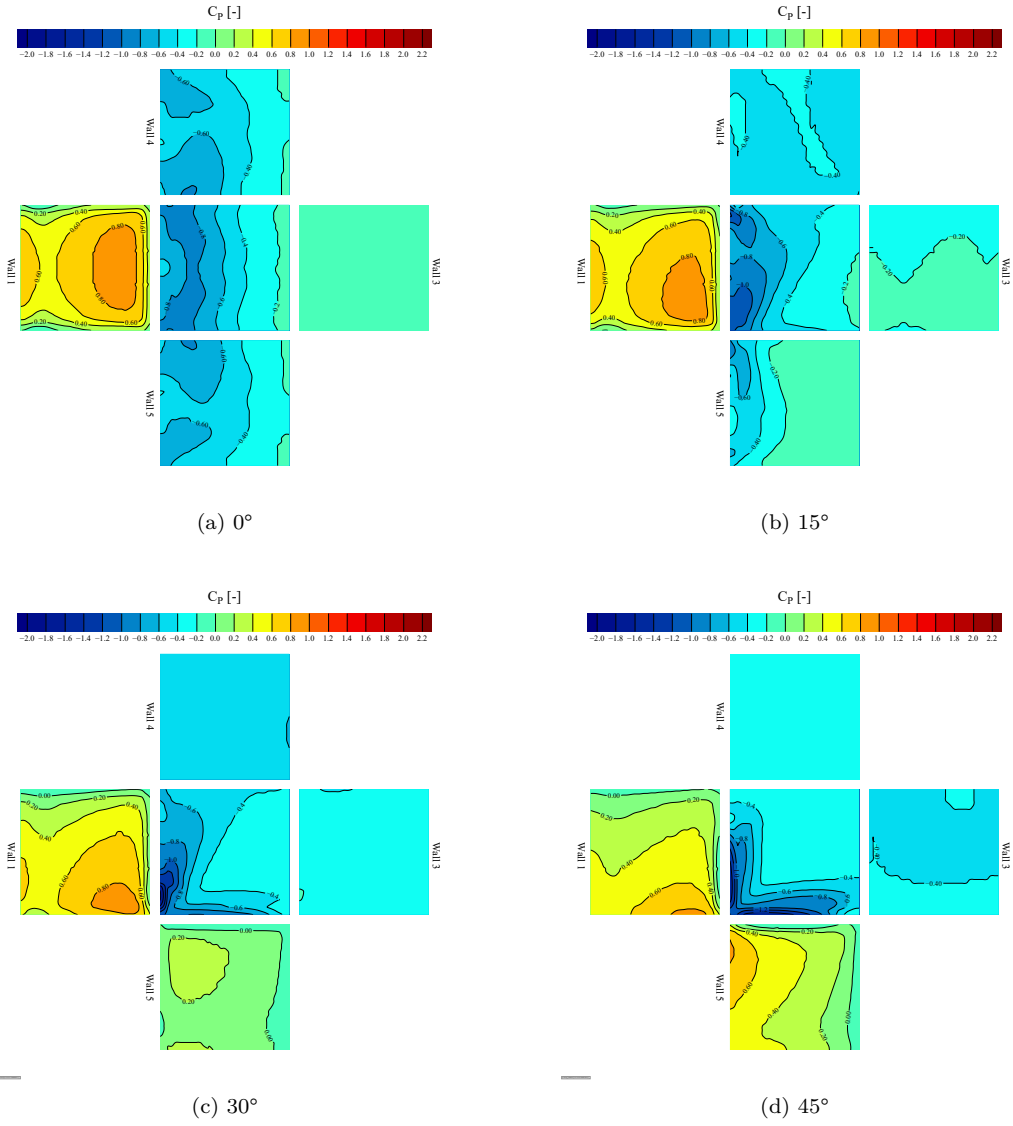

Figure 10:  $C_p$  contour maps, SST  $k-\omega$

### 1.3. Quantitative analysis of wall-averaged pressure coefficient $\overline{C_P}$

Table 1 presents the averaged pressure coefficient ( $\overline{C_P}$ ) over the entire surface, based on the available database information and the studied  $k-\epsilon$  and  $k-\omega$  turbulence models.

Table 2 presents the relative error ( $\epsilon_r$ ), calculated using Equation (1), based on the values from Table 1.

$$\epsilon_r = 100 \left| \frac{\varphi_{(x=0)} - \varphi_{(x)}}{\varphi_{(x=0)}} \right| \quad (1)$$

where  $\varphi_{(x=0)}$  represents the *reference value*, and  $\varphi_{(x)}$  denotes the *computed value*.

For the calculation of  $\epsilon_r$  in Table 2, the AIVC dataset was used as the reference value  $\varphi_{(x=0)}$ .

Yellow and green cells indicate the smallest and second smallest  $\epsilon_r$  values, respectively, for the turbulence models. The BDA and TPU  $\epsilon_r$  values are included as reference.

Following the same methodology as in Table 2, Tables 3 and 4 present the smallest and second smallest wall-averaged pressure coefficient ( $\overline{C_P}$ ) relative error ( $\epsilon_r$ ) for the studied turbulence models, considering the BDA and TPU databases as reference values, respectively.

Table 1: Comparison of  $\overline{C_P}$  on the walls. Databases,  $k$ - $\epsilon$  and  $k$ - $\omega$  turbulence models

| Database / Model            | Wind incidence | Wall 1 | Wall 2 | Wall 3 | Wall 4 | Wall 5 |
|-----------------------------|----------------|--------|--------|--------|--------|--------|
| AIVC                        | 0°             | 0.70   | -      | -0.20  | -0.50  | -0.50  |
| BDA                         | 0°             | 0.73   | -0.74  | -0.31  | -0.65  | -0.69  |
| TPU                         | 0°             | 0.68   | -0.84  | -0.35  | -0.77  | -0.75  |
| $k$ - $\epsilon$ STD        | 0°             | 0.69   | -0.44  | -0.18  | -0.41  | -0.41  |
| $k$ - $\epsilon$ Realizable | 0°             | 0.64   | -0.44  | -0.17  | -0.41  | -0.41  |
| $k$ - $\epsilon$ RNG        | 0°             | 0.64   | -0.47  | -0.22  | -0.44  | -0.44  |
| $k$ - $\omega$ STD          | 0°             | 0.74   | -0.43  | -0.18  | -0.40  | -0.40  |
| $k$ - $\omega$ SST          | 0°             | 0.58   | -0.53  | -0.16  | -0.47  | -0.47  |
| TPU                         | 15°            | 0.63   | -0.74  | -0.36  | -0.74  | -0.37  |
| $k$ - $\epsilon$ STD        | 15°            | 0.67   | -0.48  | -0.22  | -0.46  | -0.18  |
| $k$ - $\epsilon$ Realizable | 15°            | 0.63   | -0.48  | -0.22  | -0.42  | -0.19  |
| $k$ - $\epsilon$ RNG        | 15°            | 0.62   | -0.52  | -0.27  | -0.55  | -0.19  |
| $k$ - $\omega$ STD          | 15°            | 0.72   | -0.46  | -0.22  | -0.44  | -0.17  |
| $k$ - $\omega$ SST          | 15°            | 0.56   | -0.52  | -0.21  | -0.43  | -0.22  |
| BDA                         | 30°            | 0.61   | -0.72  | -0.49  | -0.72  | 0.01   |
| TPU                         | 30°            | 0.53   | -0.70  | -0.44  | -0.70  | 0.10   |
| $k$ - $\epsilon$ STD        | 30°            | 0.58   | -0.52  | -0.28  | -0.48  | 0.14   |
| $k$ - $\epsilon$ Realizable | 30°            | 0.55   | -0.51  | -0.27  | -0.44  | 0.13   |
| $k$ - $\epsilon$ RNG        | 30°            | 0.55   | -0.56  | -0.34  | -0.53  | 0.13   |
| $k$ - $\omega$ STD          | 30°            | 0.62   | -0.51  | -0.27  | -0.46  | 0.16   |
| $k$ - $\omega$ SST          | 30°            | 0.48   | -0.51  | -0.26  | -0.46  | 0.10   |
| AIVC                        | 45°            | 0.35   | -      | -0.40  | -0.40  | 0.35   |
| BDA                         | 45°            | 0.40   | -0.71  | -0.61  | -0.60  | 0.32   |
| TPU                         | 45°            | 0.33   | -0.63  | -0.52  | -0.53  | 0.34   |
| $k$ - $\epsilon$ STD        | 45°            | 0.43   | -0.49  | -0.35  | -0.35  | 0.43   |
| $k$ - $\epsilon$ Realizable | 45°            | 0.40   | -0.49  | -0.31  | -0.31  | 0.40   |
| $k$ - $\epsilon$ RNG        | 45°            | 0.40   | -0.54  | -0.41  | -0.41  | 0.40   |
| $k$ - $\omega$ STD          | 45°            | 0.45   | -0.49  | -0.32  | -0.32  | 0.45   |
| $k$ - $\omega$ SST          | 45°            | 0.36   | -0.49  | -0.41  | -0.26  | 0.32   |

Table 2: Wall  $\overline{C_P}$  relative error with respect to AIVC database

| Database /<br>Turbulence<br>model | Wind<br>incidence | Wall 1<br>[%] | Wall 2<br>[%] | Wall 3<br>[%] | Wall 4<br>[%] | Wall 5<br>[%] |
|-----------------------------------|-------------------|---------------|---------------|---------------|---------------|---------------|
| AIVC                              | 0°                | *             | *             | *             | *             | *             |
| BDA                               | 0°                | 4.29          | *             | 55.00         | 30.00         | 38.00         |
| TPU                               | 0°                | 2.86          | *             | 75.00         | 54.00         | 50.00         |
| <i>k-ε</i> STD                    | 0°                | 1.43          | *             | 10.00         | 18.00         | 18.00         |
| <i>k-ε</i> Realizable             | 0°                | 8.57          | *             | 15.00         | 18.00         | 18.00         |
| <i>k-ε</i> RNG                    | 0°                | 8.57          | *             | 10.00         | 12.00         | 12.00         |
| <i>k-ω</i> STD                    | 0°                | 5.71          | *             | 10.00         | 20.00         | 20.00         |
| <i>k-ω</i> SST                    | 0°                | 17.14         | *             | 20.00         | 6.00          | 6.00          |
| AIVC                              | 45°               | *             | *             | *             | *             | *             |
| BDA                               | 45°               | 14.29         | *             | 52.50         | 50.00         | 8.57          |
| TPU                               | 45°               | 5.71          | *             | 30.00         | 32.50         | 2.86          |
| <i>k-ε</i> STD                    | 45°               | 22.86         | *             | 12.50         | 12.50         | 22.86         |
| <i>k-ε</i> Realizable             | 45°               | 14.29         | *             | 22.50         | 22.50         | 14.29         |
| <i>k-ε</i> RNG                    | 45°               | 14.29         | *             | 2.50          | 2.50          | 14.29         |
| <i>k-ω</i> STD                    | 45°               | 28.57         | *             | 20.00         | 20.00         | 28.57         |
| <i>k-ω</i> SST                    | 45°               | 2.86          | *             | 2.50          | 35.00         | 8.57          |

Table 3: Wall  $\overline{C_P}$  relative error with respect to BDA database

| Turbulence model      | Wind incidence | Wall 1 [%] | Wall 2 [%] | Wall 3 [%] | Wall 4 [%] | Wall 5 [%] |
|-----------------------|----------------|------------|------------|------------|------------|------------|
| <i>k-ε</i> STD        | 0°             | 10.96      | 37.84      | 41.94      | 36.92      | 40.58      |
| <i>k-ε</i> Realizable | 0°             | 17.81      | 37.84      | 45.16      | 36.92      | 40.58      |
| <i>k-ε</i> RNG        | 0°             | 19.18      | 33.78      | 25.81      | 27.69      | 31.88      |
| <i>k-ω</i> STD        | 0°             | 1.37       | 37.84      | 41.94      | 38.46      | 42.03      |
| <i>k-ω</i> SST        | 0°             | 26.03      | 29.73      | 48.39      | 29.23      | 33.33      |
| <i>k-ε</i> STD        | 30°            | 6.56       | 25.00      | 40.82      | 33.33      | 1200.00    |
| <i>k-ε</i> Realizable | 30°            | 14.75      | 26.39      | 44.90      | 38.89      | 1000.00    |
| <i>k-ε</i> RNG        | 30°            | 13.11      | 19.44      | 30.61      | 26.39      | 1000.00    |
| <i>k-ω</i> STD        | 30°            | 0.00       | 26.39      | 44.90      | 36.11      | 1400.00    |
| <i>k-ω</i> SST        | 30°            | 26.23      | 26.39      | 46.94      | 36.11      | 800.00     |
| <i>k-ε</i> STD        | 45°            | 5.00       | 28.17      | 44.26      | 43.33      | 31.25      |
| <i>k-ε</i> Realizable | 45°            | 5.00       | 29.58      | 50.82      | 50.00      | 18.75      |
| <i>k-ε</i> RNG        | 45°            | 5.00       | 21.13      | 32.79      | 31.67      | 18.75      |
| <i>k-ω</i> STD        | 45°            | 12.50      | 28.17      | 49.18      | 48.33      | 40.63      |
| <i>k-ω</i> SST        | 45°            | 12.50      | 29.58      | 32.79      | 56.67      | 3.13       |

Table 4: Wall  $\overline{C_P}$  relative error with respect to TPU database

| Turbulence model        | Wind incidence | Wall 1 [%] | Wall 2 [%] | Wall 3 [%] | Wall 4 [%] | Wall 5 [%] |
|-------------------------|----------------|------------|------------|------------|------------|------------|
| $k-\epsilon$ STD        | 0°             | 8.82       | 50.00      | 48.57      | 46.75      | 45.33      |
| $k-\epsilon$ Realizable | 0°             | 1.47       | 48.81      | 51.43      | 48.05      | 46.67      |
| $k-\epsilon$ RNG        | 0°             | 1.47       | 45.24      | 34.29      | 41.56      | 40.00      |
| $k-\omega$ STD          | 0°             | 17.65      | 50.00      | 48.57      | 48.05      | 46.67      |
| $k-\omega$ SST          | 0°             | 10.29      | 35.71      | 54.29      | 38.96      | 37.33      |
| $k-\epsilon$ STD        | 15°            | 14.29      | 39.19      | 38.89      | 37.84      | 54.05      |
| $k-\epsilon$ Realizable | 15°            | 6.35       | 37.84      | 41.67      | 43.24      | 51.35      |
| $k-\epsilon$ RNG        | 15°            | 6.35       | 33.78      | 25.00      | 25.68      | 51.35      |
| $k-\omega$ STD          | 15°            | 23.81      | 40.54      | 41.67      | 40.54      | 54.05      |
| $k-\omega$ SST          | 15°            | 6.35       | 29.73      | 41.67      | 41.89      | 40.54      |
| $k-\epsilon$ STD        | 30°            | 16.98      | 31.43      | 36.36      | 31.43      | 60.00      |
| $k-\epsilon$ Realizable | 30°            | 9.43       | 31.43      | 38.64      | 37.14      | 40.00      |
| $k-\epsilon$ RNG        | 30°            | 9.43       | 25.71      | 22.73      | 24.29      | 40.00      |
| $k-\omega$ STD          | 30°            | 24.53      | 31.43      | 38.64      | 34.29      | 70.00      |
| $k-\omega$ SST          | 30°            | 3.77       | 30.00      | 40.91      | 34.29      | 10.00      |
| $k-\epsilon$ STD        | 45°            | 36.36      | 26.98      | 34.62      | 35.85      | 32.35      |
| $k-\epsilon$ Realizable | 45°            | 27.27      | 26.98      | 40.38      | 41.51      | 20.59      |
| $k-\epsilon$ RNG        | 45°            | 27.27      | 20.63      | 21.15      | 22.64      | 20.59      |
| $k-\omega$ STD          | 45°            | 42.42      | 26.98      | 40.38      | 39.62      | 38.24      |
| $k-\omega$ SST          | 45°            | 15.15      | 28.57      | 21.15      | 52.83      | 0.00       |



observations, and all turbulence models tested in this study.

Section 2.4 presents a qualitative analysis of the local pressure coefficients along the horizontal and vertical center-lines of the building. The analysis considers wind incidence angles of  $0^\circ$ ,  $15^\circ$ ,  $30^\circ$ , and  $45^\circ$ , and the results are compared with experimental data from the BDA and TPU datasets.

Section 2.5 presents the turbulent kinetic energy and turbulent viscosity fields on parallel and cross-sectional planes relative to the ABL angle of attack.

Section 2.6 qualitatively compares the streamlines in the top view, formed by the wind flow at  $0^\circ$ ,  $15^\circ$ ,  $30^\circ$ , and  $45^\circ$  for all the turbulence models studied. The objective is to identify differences in the recirculation and flow separation patterns for each turbulence model.

## 2.1. Pressure Coefficient Contour Maps. BDA vs CFD

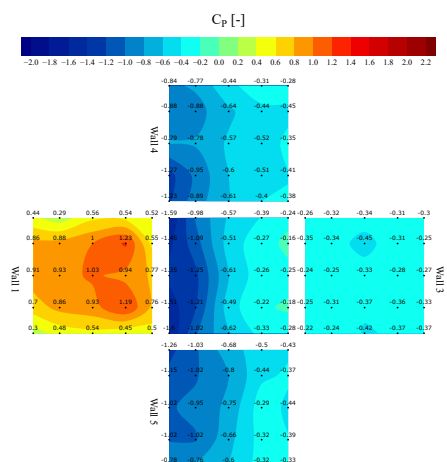

Figure 12:  $C_P$  contour maps, BDA  $0^\circ$

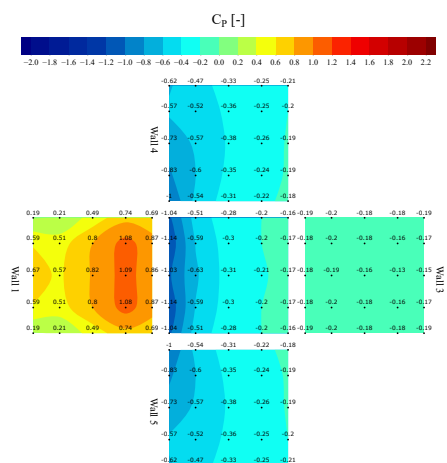

Figure 13:  $C_P$  contour maps at BDA tap coordinates, STD  $k-\epsilon$ ,  $0^\circ$

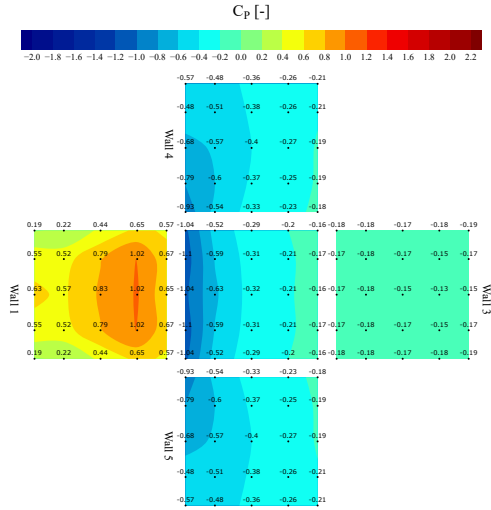

Figure 14:  $C_p$  contour maps at BDA tap coordinates, Realizable  $k-\epsilon$ ,  $0^\circ$

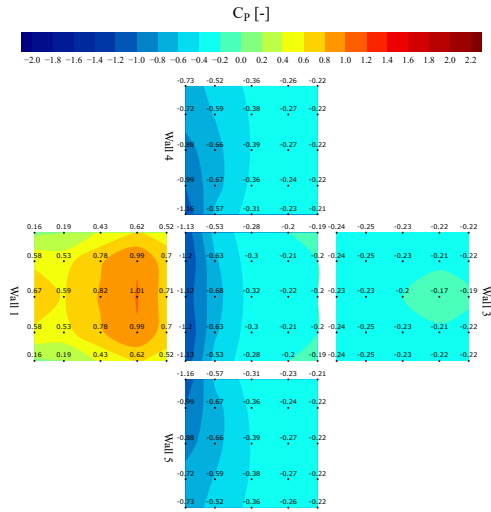

Figure 15:  $C_p$  contour maps at BDA tap coordinates, RNG  $k-\epsilon$ ,  $0^\circ$

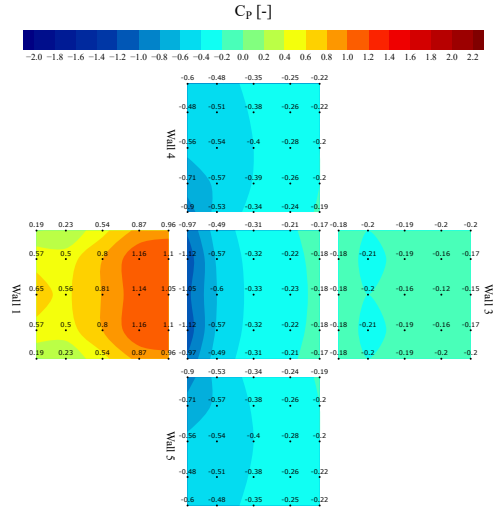

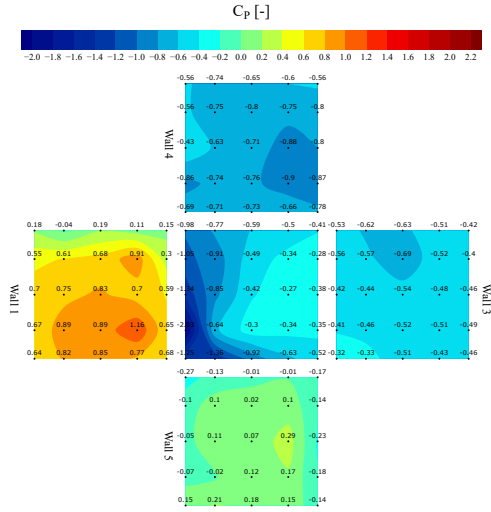

Figure 18:  $C_P$  contour maps, BDA 30°

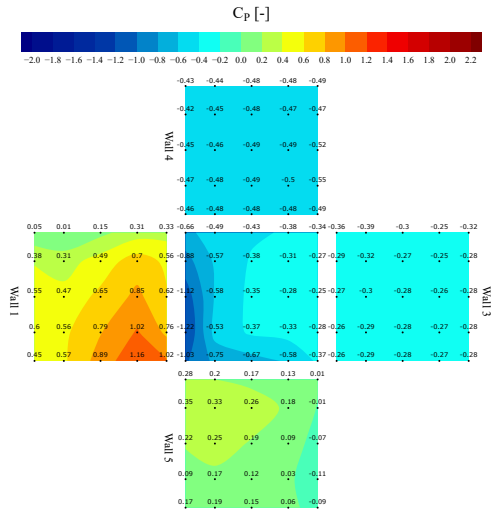

Figure 19:  $C_P$  contour maps at BDA tap coordinates, STD  $k-\epsilon$ , 30°

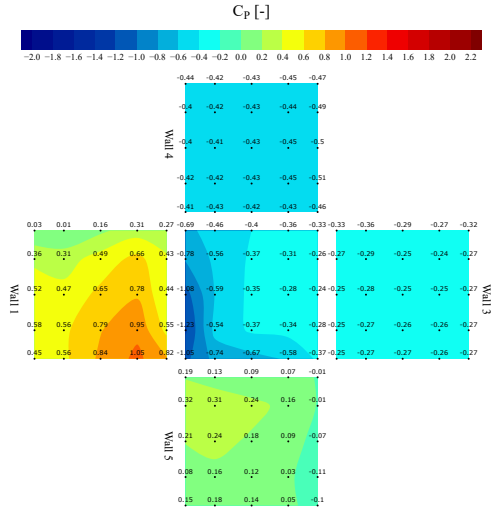

Figure 20:  $C_P$  contour maps at BDA tap coordinates, Realizable  $k-\epsilon$ ,  $30^\circ$

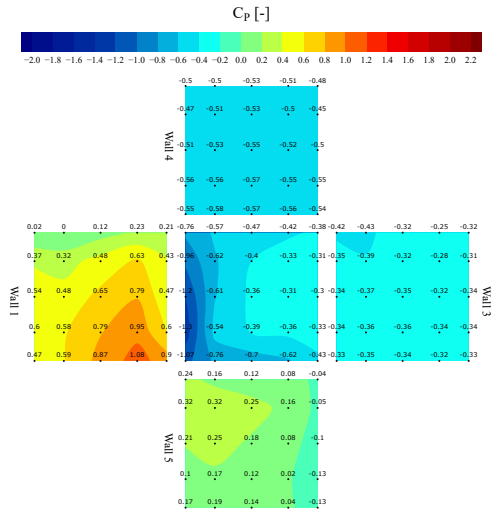

Figure 21:  $C_P$  contour maps at BDA tap coordinates, RNG  $k-\epsilon$ ,  $30^\circ$

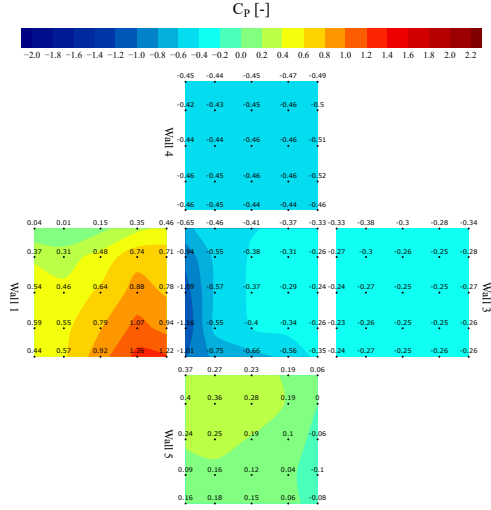

Figure 22:  $C_P$  contour maps at BDA tap coordinates, STD  $k-\omega$ ,  $30^\circ$

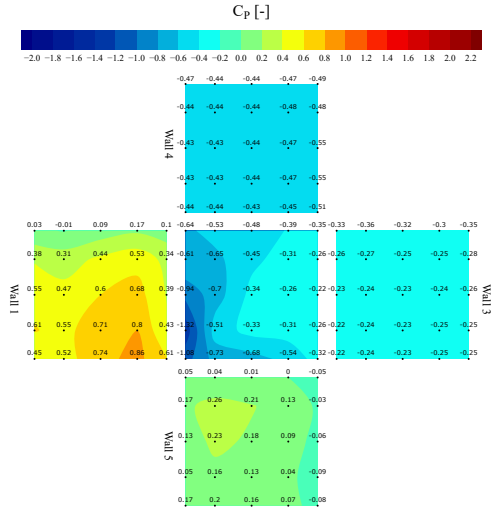

Figure 23:  $C_P$  contour maps at BDA tap coordinates, SST  $k-\omega$ ,  $30^\circ$

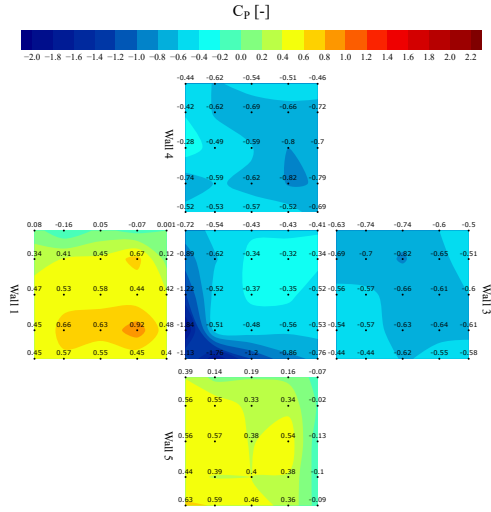

Figure 24:  $C_P$  contour maps, BDA  $45^\circ$



Figure 25:  $C_P$  contour maps at BDA tap coordinates, STD  $k-\epsilon$ ,  $45^\circ$

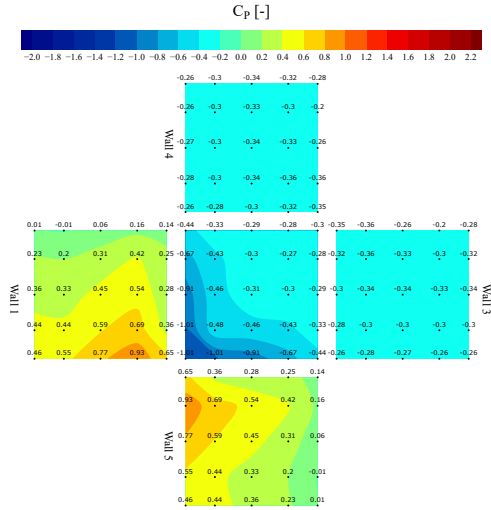

Figure 26:  $C_P$  contour maps at BDA tap coordinates, Realizable  $k-\epsilon$ ,  $45^\circ$

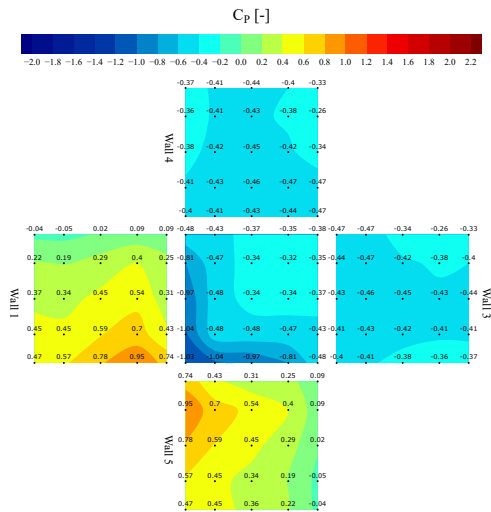

Figure 27:  $C_P$  contour maps at BDA tap coordinates, RNG  $k-\epsilon$ ,  $45^\circ$



## 2.2. Pressure Coefficient Contour Maps. TPU vs CFD

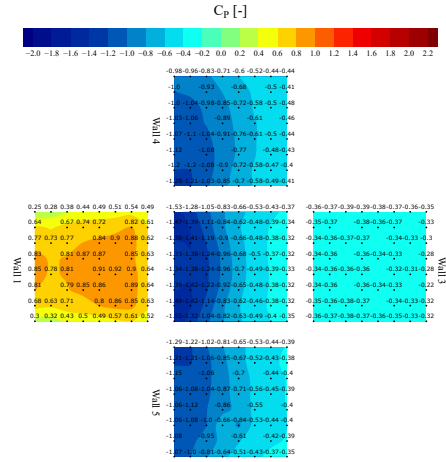

Figure 30:  $C_P$  contour maps, TPU  $0^\circ$

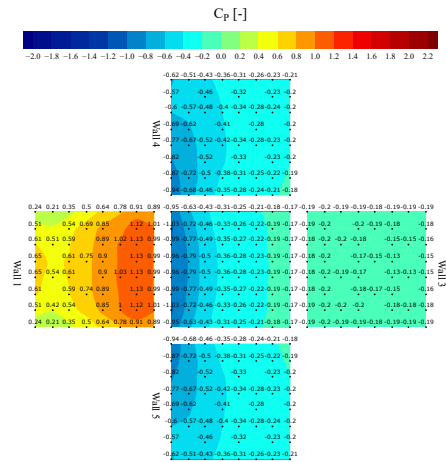

Figure 31:  $C_P$  contour maps at TPU tap coordinates, STD  $k-\epsilon$ ,  $0^\circ$

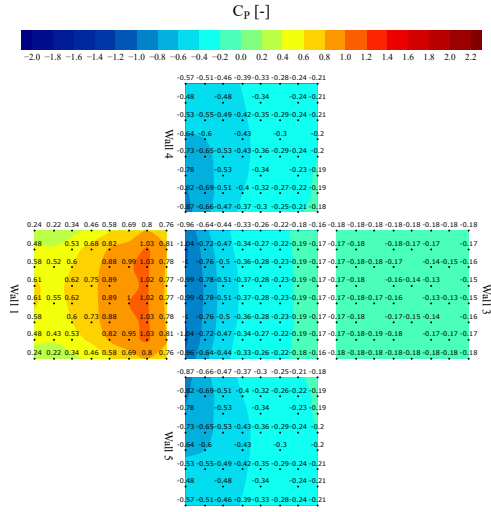

Figure 32:  $C_P$  contour maps at TPU tap coordinates, Realizable  $k-\epsilon$ ,  $0^\circ$

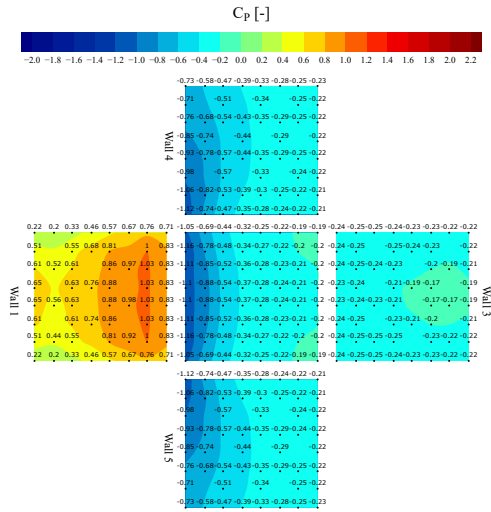

Figure 33:  $C_P$  contour maps at TPU tap coordinates, RNG  $k-\epsilon$ ,  $0^\circ$

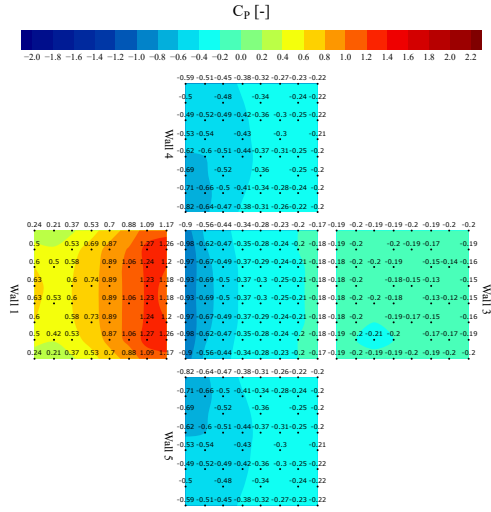

Figure 34:  $C_P$  contour maps at TPU tap coordinates, STD  $k-\omega$ ,  $0^\circ$

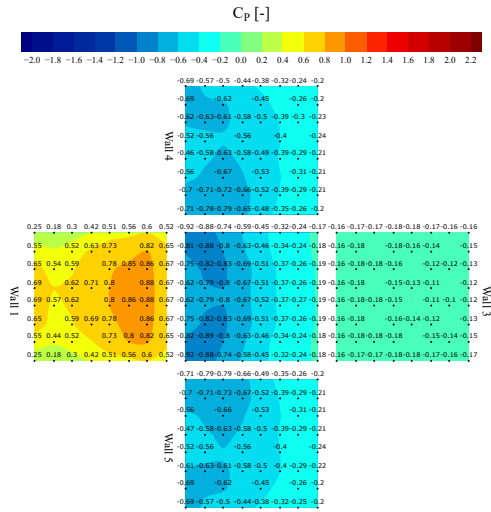

Figure 35:  $C_P$  contour maps at TPU tap coordinates, SST  $k-\omega$ ,  $0^\circ$

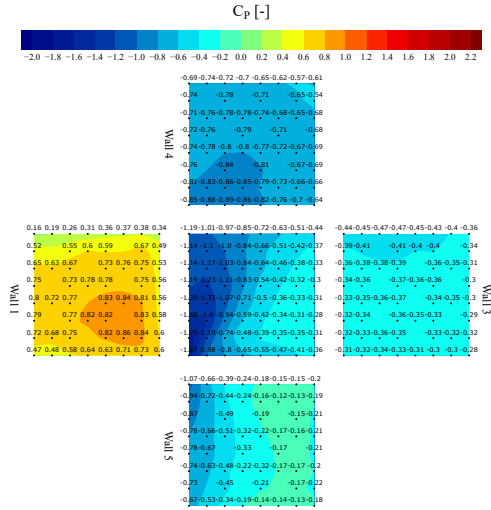

Figure 36:  $C_P$  contour maps, TPU 15°

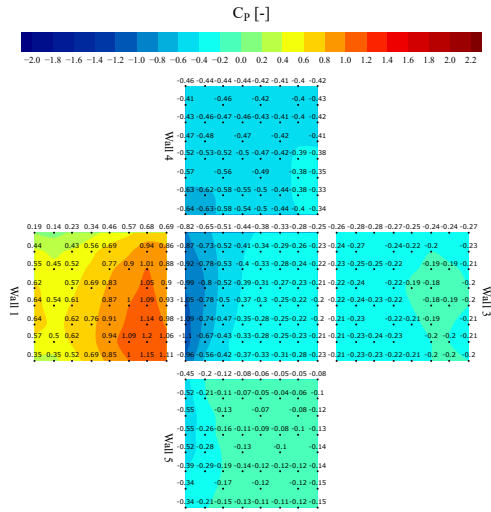

Figure 37:  $C_P$  contour maps at TPU tap coordinates, STD  $k-\epsilon$ , 15°

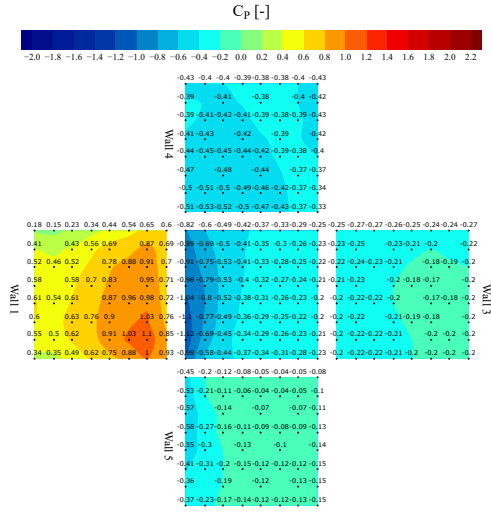

Figure 38:  $C_P$  contour maps at TPU tap coordinates, Realizable  $k-\epsilon$ ,  $15^\circ$

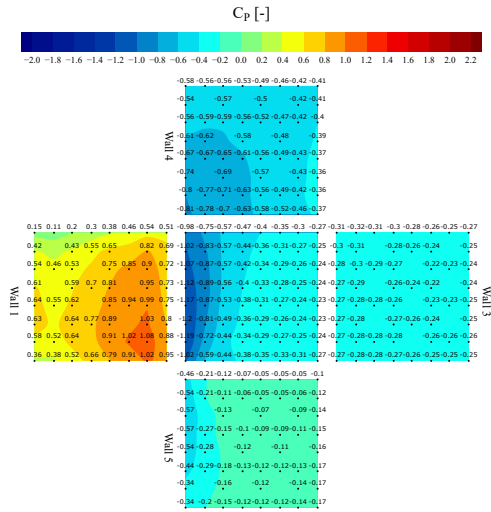

Figure 39:  $C_P$  contour maps at TPU tap coordinates, RNG  $k-\epsilon$ ,  $15^\circ$

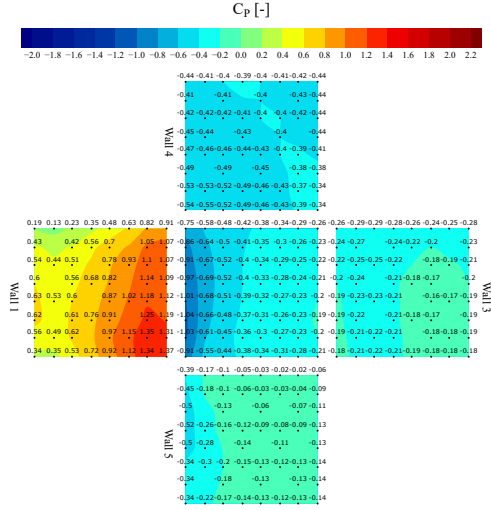

Figure 40:  $C_P$  contour maps at TPU tap coordinates, STD  $k-\omega$ ,  $15^\circ$

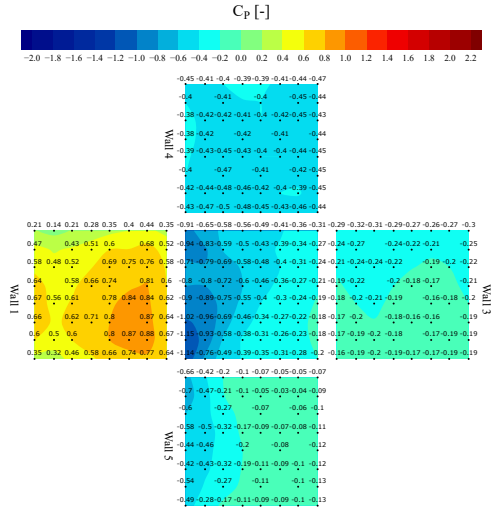

Figure 41:  $C_P$  contour maps at TPU tap coordinates, SST  $k-\omega$ ,  $15^\circ$

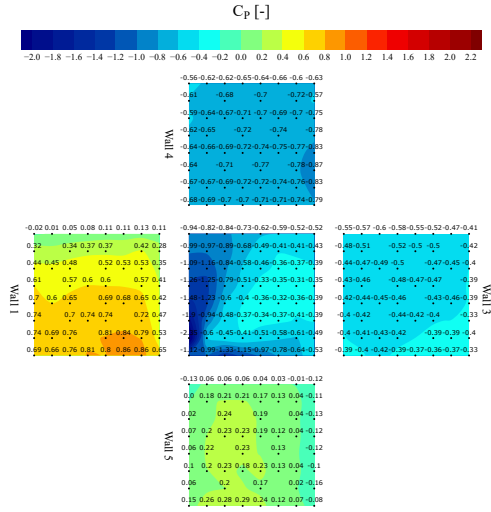

Figure 42:  $C_P$  contour maps, TPU 30°

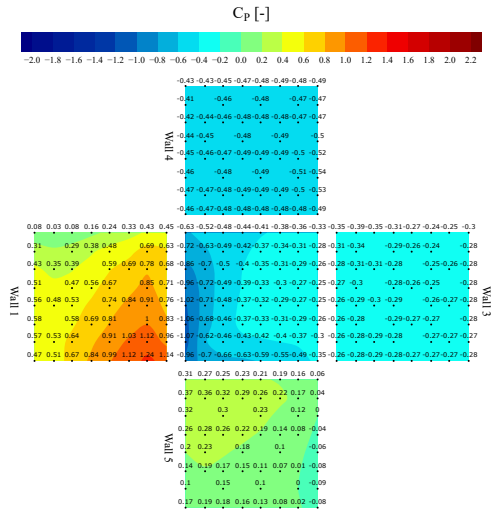

Figure 43:  $C_P$  contour maps at TPU tap coordinates, STD  $k-\epsilon$ , 30°

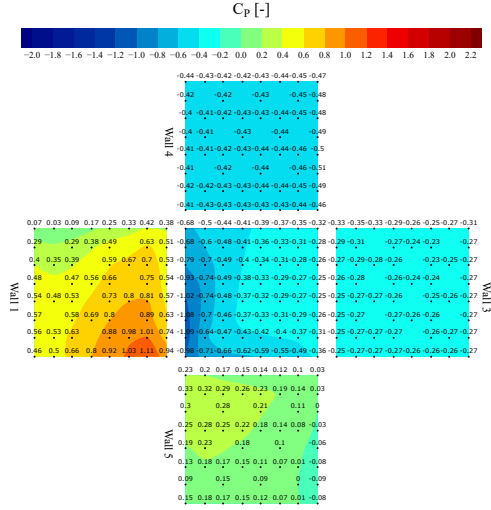

Figure 44:  $C_P$  contour maps at TPU tap coordinates, Realizable  $k-\epsilon$ ,  $30^\circ$

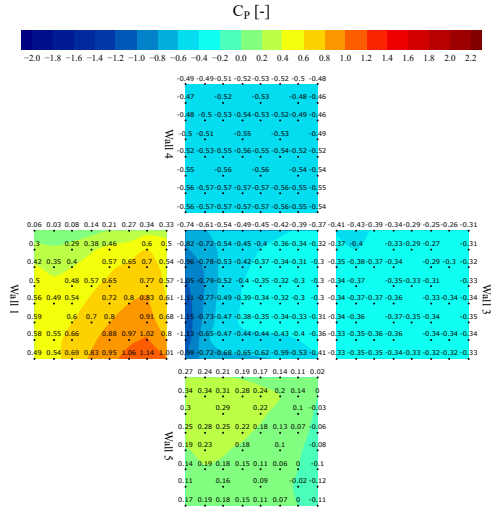

Figure 45:  $C_P$  contour maps at TPU tap coordinates, RNG  $k-\epsilon$ ,  $30^\circ$

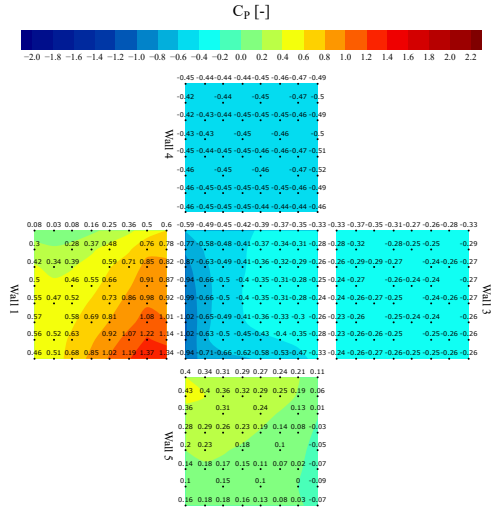

Figure 46:  $C_P$  contour maps at TPU tap coordinates, STD  $k-\omega$ ,  $30^\circ$

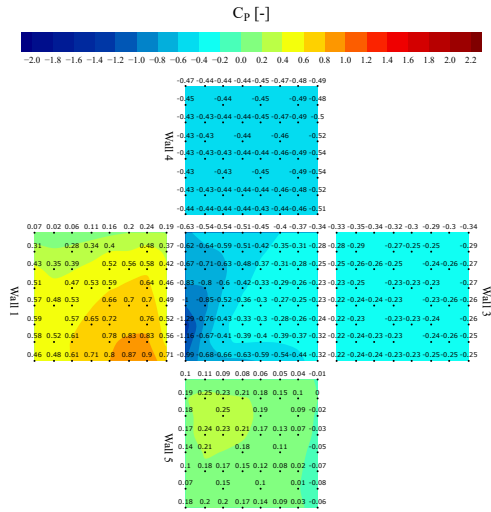

Figure 47:  $C_P$  contour maps at TPU tap coordinates, SST  $k-\omega$ ,  $30^\circ$

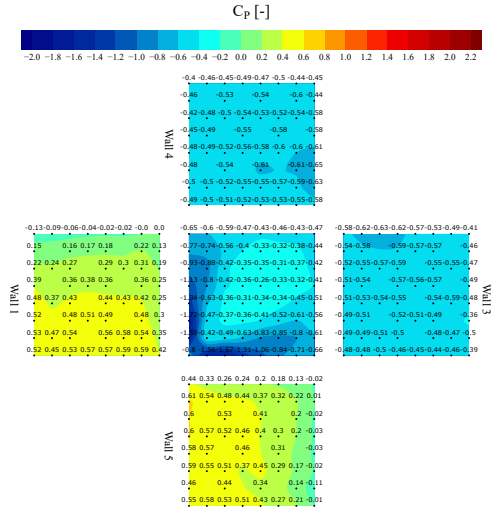

Figure 48:  $C_p$  contour maps, TPU 45°

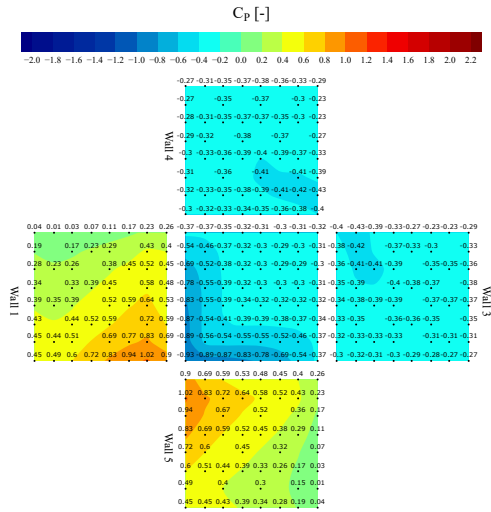

Figure 49:  $C_p$  contour maps at TPU tap coordinates, STD  $k-\epsilon$ , 45°

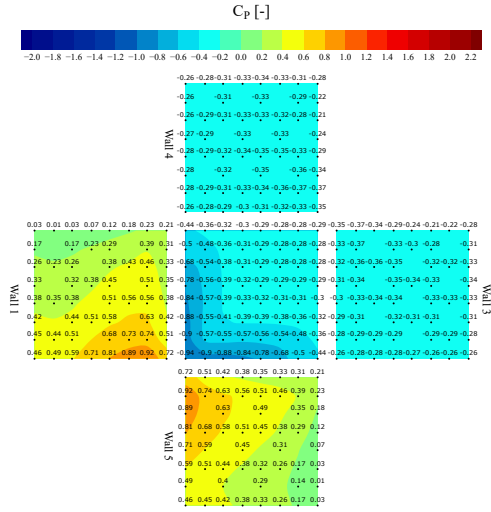

Figure 50:  $C_P$  contour maps at TPU tap coordinates, Realizable  $k-\epsilon$ ,  $45^\circ$

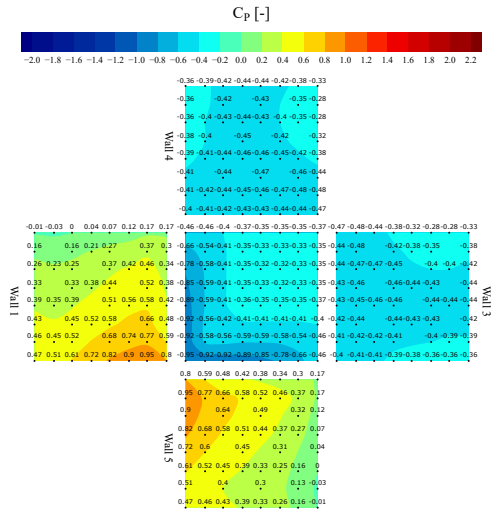

Figure 51:  $C_P$  contour maps at TPU tap coordinates, RNG  $k-\epsilon$ ,  $45^\circ$

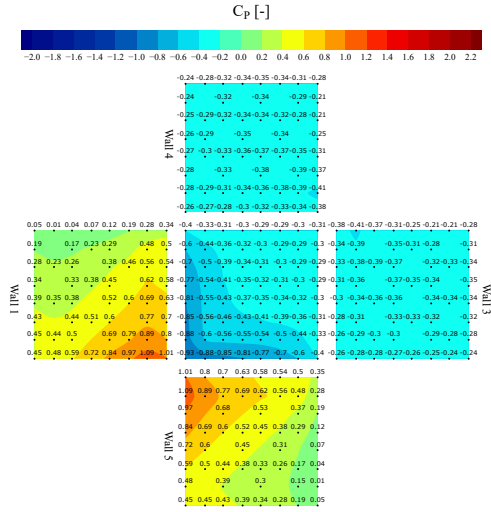

Figure 52:  $C_P$  contour maps at TPU tap coordinates, STD  $k-\omega$ ,  $45^\circ$

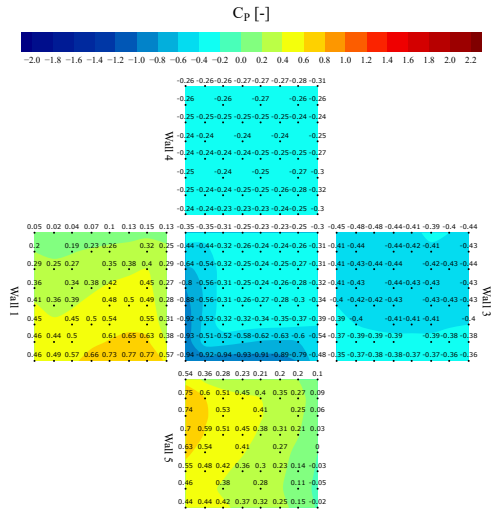

Figure 53:  $C_P$  contour maps at TPU tap coordinates, SST  $k-\omega$ ,  $45^\circ$

### 2.3. BDA and TPU Normalized Mean Square Error (NMSE) and Normalized Root Mean Square Error ( $\varepsilon$ )

To assess the accuracy of the turbulence models against data from the BDA (Figure 56) and TPU (Figure 57) databases, the Normalized Mean Square Error (NMSE) and Normalized Root Mean Square Error ( $\varepsilon$ ) were computed for each wall and for all turbulence models (see Equations (2) and (3)). NMSE quantifies the model's overall performance across the dataset. According to stringent validation criteria, an NMSE of zero indicates perfect agreement, while values below 1.5 are considered acceptable for accurate simulations. NMSE is defined as:

$$NMSE = \frac{\sum_{i=1}^n (y_i - \hat{y})^2}{\sum_{i=1}^n y_i \hat{y}} \quad (2)$$

Similarly, the normalized root mean square error ( $\varepsilon$ ) is given by:

$$\varepsilon = \frac{\sqrt{\frac{\sum_{i=1}^n (y_i - \hat{y})^2}{n}}}{\bar{y}} \quad (3)$$

where  $y_i$  and  $\hat{y}$  are the observed and predicted  $C_P$  values at the  $i$ th tap position, respectively,  $n$  is the total number of taps on the wall, and  $\bar{y}$  is the mean wall  $C_P$  value.

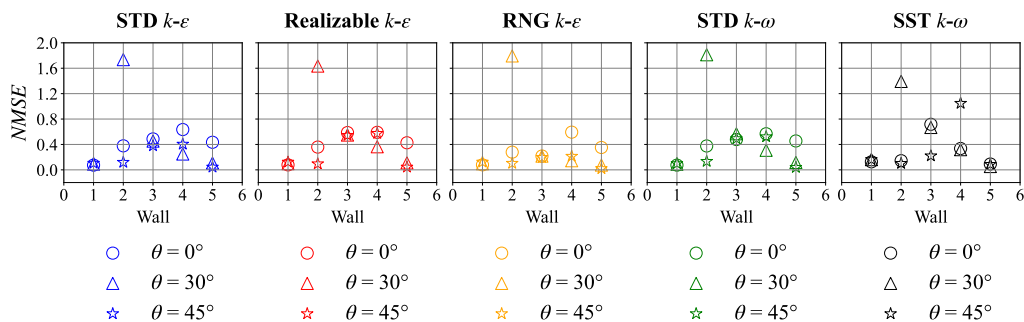

Figure 54:  $NMSE$  referred to BDA basedata per wall for all turbulence models.

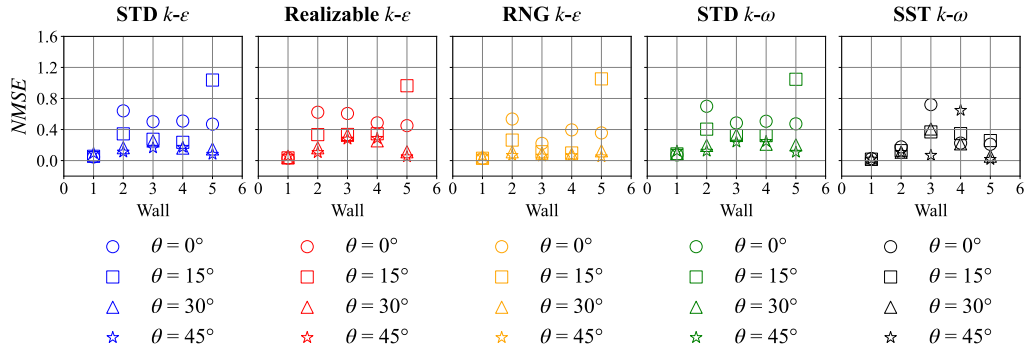

Figure 55:  $NMSE$  referred to TPU basedata per wall for all turbulence models.

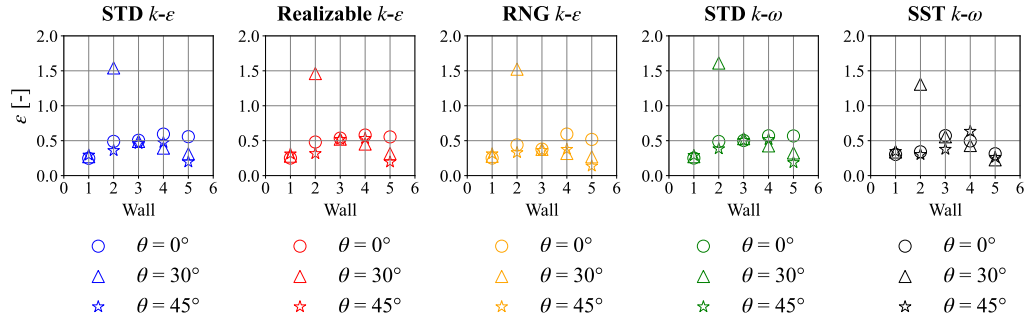

Figure 56:  $\epsilon$  referred to BDA basedata per wall for all turbulence models.

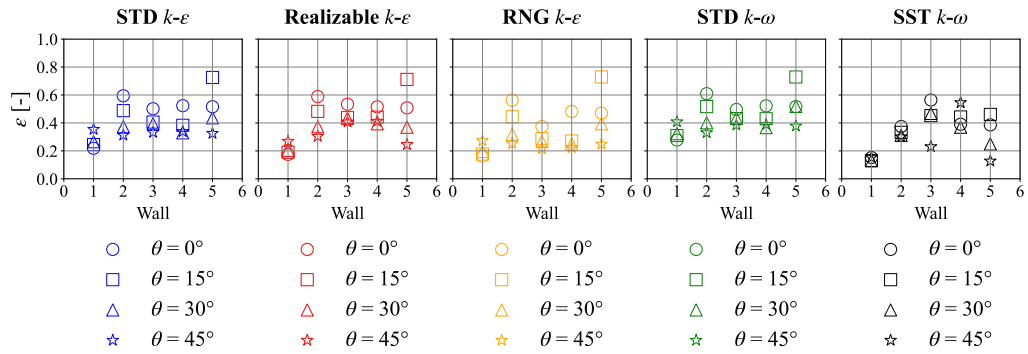

Figure 57:  $\epsilon$  referred to TPU basedata per wall for all turbulence models.

## 2.4. Comparison Of Pressure Coefficients At Wall Center-lines With Respect To Databases

Figure 58 illustrates the relative positions of the pressure taps in the BDA and TPU experimental studies. For clarity, the blue line will henceforth be referred to as the “horizontal center-line”, and the red line as the “vertical center-line”.

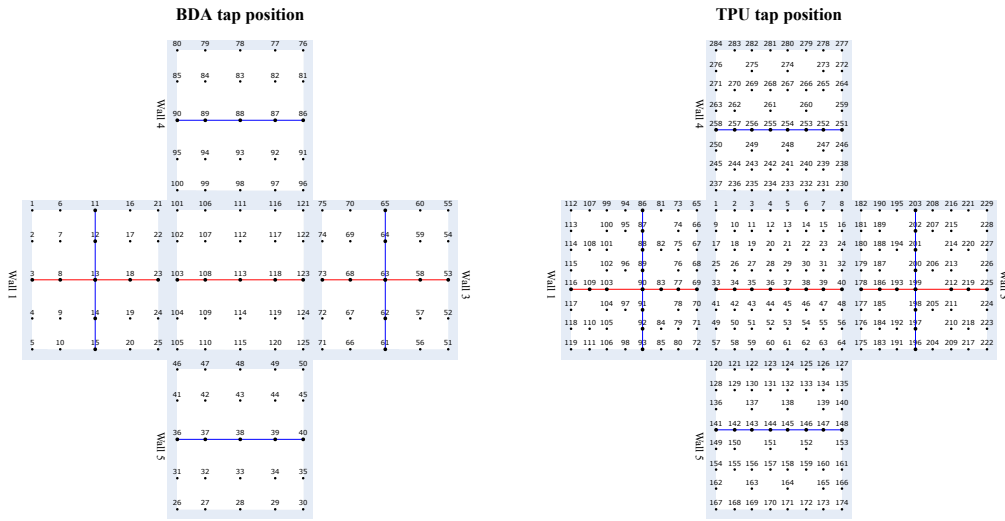

(a) BDA center-lines

(b) TPU center-lines

Figure 58: Center-lines at BDA and TPU tap position

Figures 59 to 62 present the local pressure coefficients along the horizontal and vertical center-lines for wind incidence angles of  $0^\circ$ ,  $15^\circ$ ,  $30^\circ$ , and  $45^\circ$ . These results are compared with experimental data obtained from the BDA and TPU datasets.

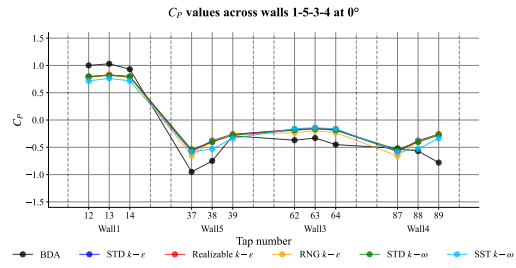

(a) BDA  $C_P$  at horizontal center-line at  $0^\circ$

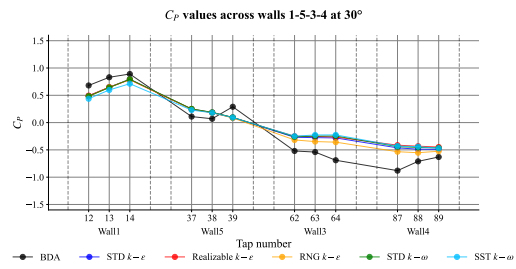

(b) BDA  $C_P$  at horizontal center-line at  $30^\circ$

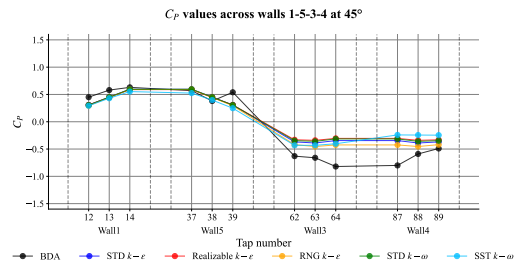

(c) BDA  $C_P$  at horizontal center-line at  $45^\circ$

Figure 59: BDA  $C_P$  along horizontal center-line

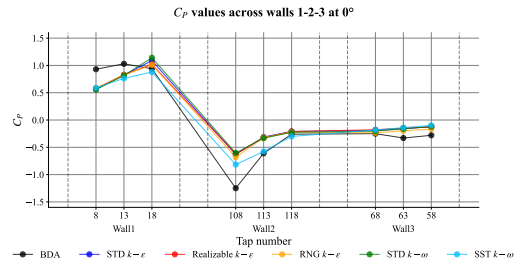

(a) BDA  $C_P$  at vertical center-line at  $0^\circ$

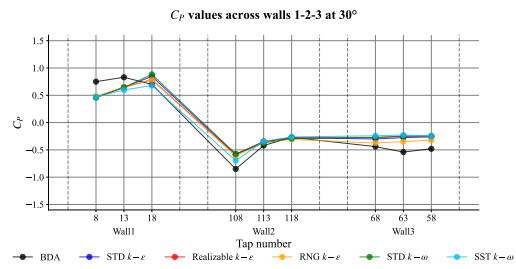

(b) BDA  $C_P$  at vertical center-line at  $30^\circ$

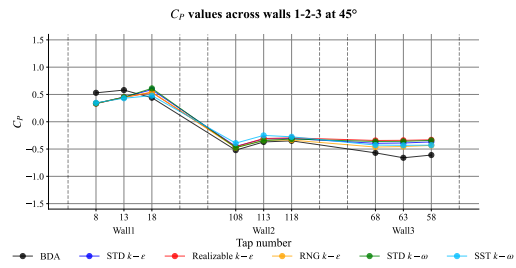

(c) BDA  $C_P$  at vertical center-line at  $45^\circ$

Figure 60: BDA  $C_P$  along vertical center-line

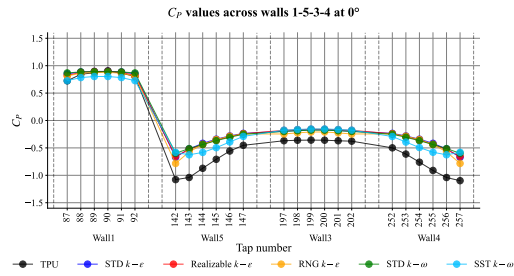

(a) TPU  $C_P$  at horizontal center-line at  $0^\circ$

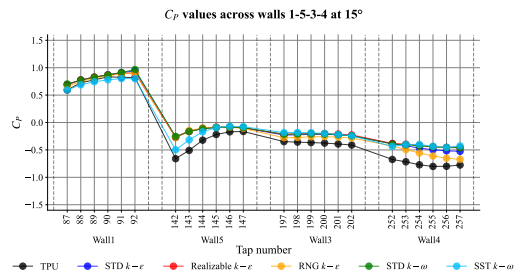

(b) TPU  $C_P$  at horizontal center-line at  $15^\circ$

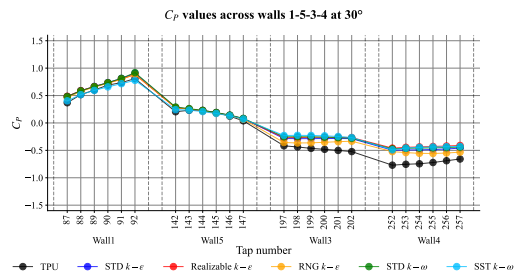

(c) TPU  $C_P$  at horizontal center-line at  $30^\circ$

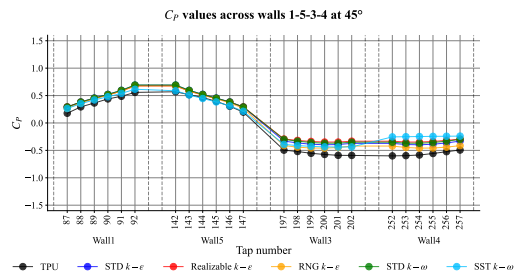

(d) TPU  $C_P$  at horizontal center-line at  $45^\circ$

Figure 61: TPU  $C_P$  along horizontal center-line

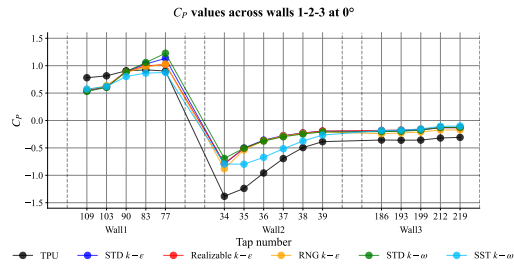

(a) TPU  $C_P$  at vertical center-line at  $0^\circ$

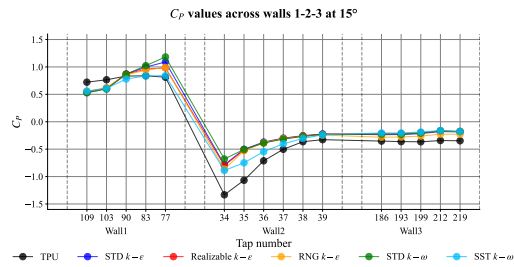

(b) TPU  $C_P$  at vertical center-line at  $15^\circ$

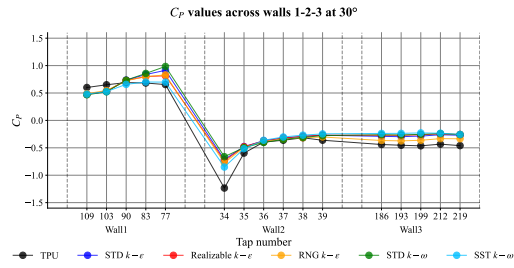

(c) TPU  $C_P$  at vertical center-line at  $30^\circ$

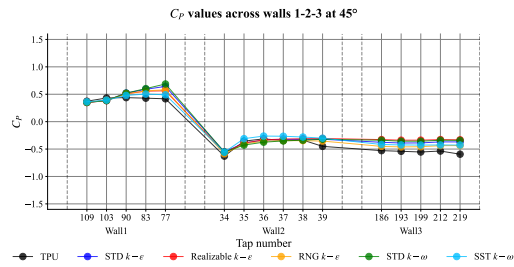

(d) TPU  $C_P$  at vertical center-line at  $45^\circ$

Figure 62: TPU  $C_P$  along vertical center-line

2.5. *Turbulent Kinetic Energy and Turbulent Viscosity Fields in Parallel and Cross-Sectional Planes*

Figures 64 to 78 present H/2 sections, oriented parallel and transverse to the flow, illustrating the turbulent viscosity variable for the studied turbulence models at wind incidence angles of 0°, 15°, 30°, and 45°.

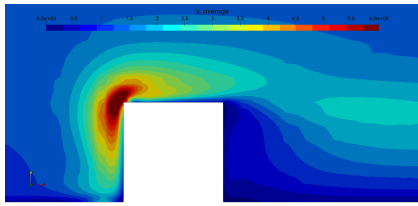

(a) Turbulent kinetic energy ( $k$ ) field in the parallel flow plane for the STD  $k$ - $\epsilon$  model at 0°

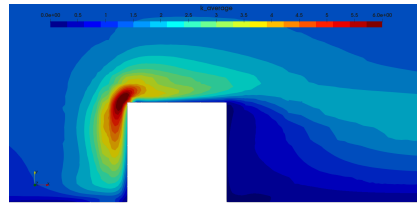

(b) Turbulent kinetic energy ( $k$ ) field in the parallel flow plane for the Realizable  $k$ - $\epsilon$  model at 0°

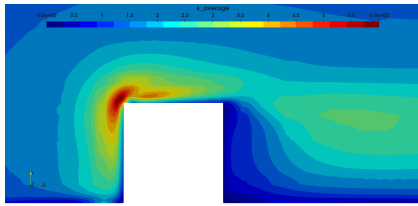

(c) Turbulent kinetic energy ( $k$ ) field in the parallel flow plane for the RNG  $k$ - $\epsilon$  model at 0°

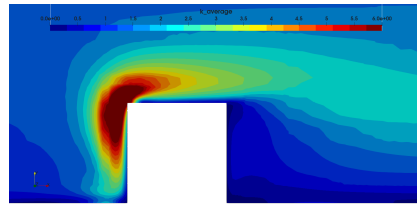

(d) Turbulent kinetic energy ( $k$ ) field in the parallel flow plane for the STD  $k$ - $\omega$  model at 0°

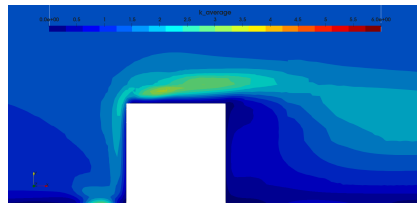

(e) Turbulent kinetic energy ( $k$ ) field in the parallel flow plane for the SST  $k$ - $\omega$  model at 0°

Figure 63: Turbulent kinetic energy ( $k$ ) field in the parallel flow plane for tested turbulence models at 0°

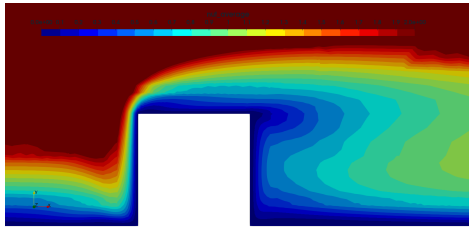

(a) Turbulent viscosity ( $\nu_t$ ) field in the parallel flow plane for the STD  $k-\epsilon$  model at  $0^\circ$

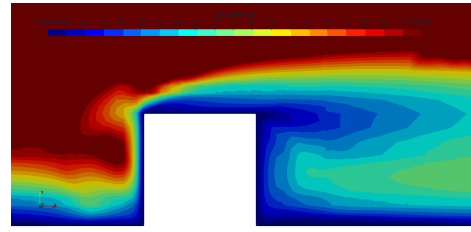

(b) Turbulent viscosity ( $\nu_t$ ) field in the parallel flow plane for the Realizable  $k-\epsilon$  model at  $0^\circ$

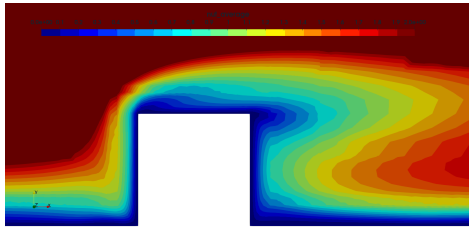

(c) Turbulent viscosity ( $\nu_t$ ) field in the parallel flow plane for the RNG  $k-\epsilon$  model at  $0^\circ$

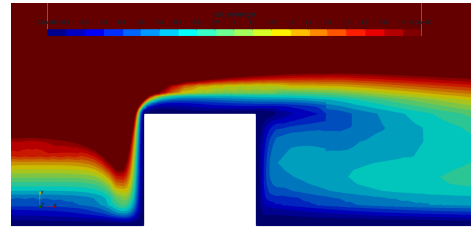

(d) Turbulent viscosity ( $\nu_t$ ) field in the parallel flow plane for the STD  $k-\omega$  model at  $0^\circ$

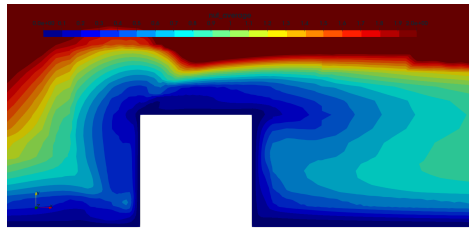

(e) Turbulent viscosity ( $\nu_t$ ) field in the parallel flow plane for the SST  $k-\omega$  model at  $0^\circ$

Figure 64: Turbulent viscosity ( $\nu_t$ ) field in the parallel flow plane for tested turbulence models at  $0^\circ$

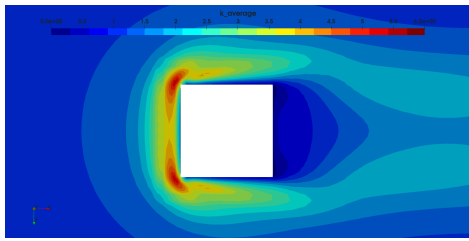

(a) Turbulent kinetic energy ( $k$ ) field in the cross-sectional plane for the STD  $k$ - $\epsilon$  model at  $0^\circ$

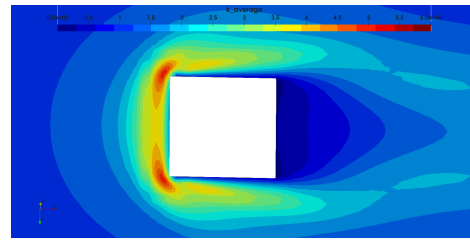

(b) Turbulent kinetic energy ( $k$ ) field in the cross-sectional plane for the Realizable  $k$ - $\epsilon$  model at  $0^\circ$

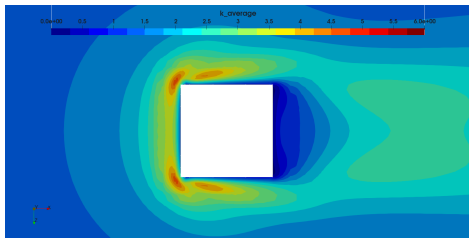

(c) Turbulent kinetic energy ( $k$ ) field in the cross-sectional plane for the RNG  $k$ - $\epsilon$  model at  $0^\circ$

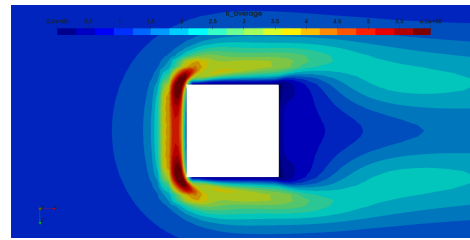

(d) Turbulent kinetic energy ( $k$ ) field in the cross-sectional plane for the STD  $k$ - $\omega$  model at  $0^\circ$

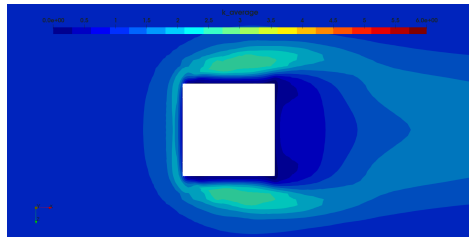

(e) Turbulent kinetic energy ( $k$ ) field in the cross-sectional plane for the SST  $k$ - $\omega$  model at  $0^\circ$

Figure 65: Cross-sectional turbulent kinetic energy ( $k$ ) field for tested turbulence models at  $0^\circ$

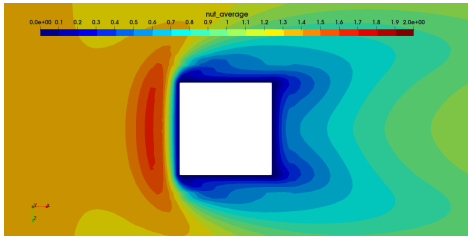

(a) Turbulent viscosity ( $\nu_t$ ) field in the cross-sectional plane for the STD  $k$ - $\epsilon$  model at  $0^\circ$

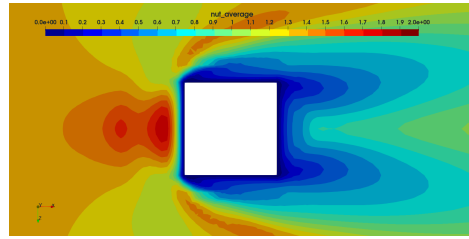

(b) Turbulent viscosity ( $\nu_t$ ) field in the cross-sectional plane for the Real  $k$ - $\epsilon$  model at  $0^\circ$

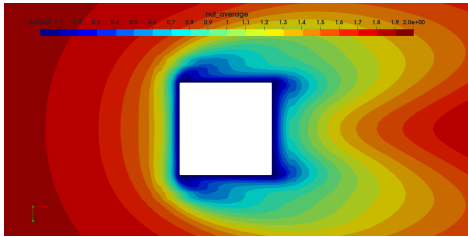

(c) Turbulent viscosity ( $\nu_t$ ) field in the cross-sectional plane for the RNG  $k$ - $\epsilon$  model at  $0^\circ$

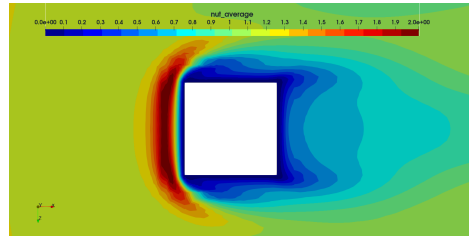

(d) Turbulent viscosity ( $\nu_t$ ) field in the cross-sectional plane for the STD  $k$ - $\omega$  model at  $0^\circ$

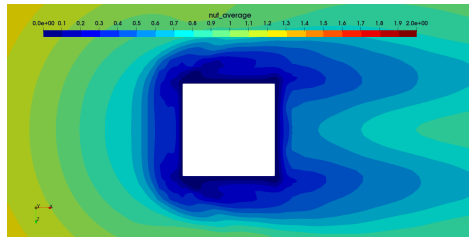

(e) Turbulent viscosity ( $\nu_t$ ) field in the cross-sectional plane for the SST  $k$ - $\omega$  model at  $0^\circ$

Figure 66: Cross-sectional turbulent viscosity ( $\nu_t$ ) field for tested turbulence models at  $0^\circ$

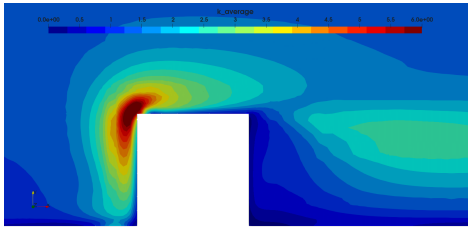

(a) Turbulent kinetic energy ( $k$ ) field in the parallel flow plane for the STD  $k$ - $\epsilon$  model at  $15^\circ$

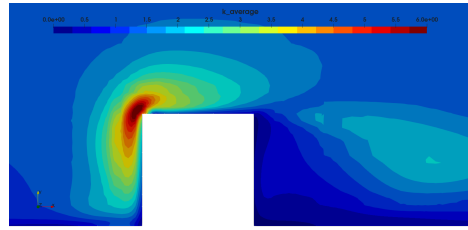

(b) Turbulent kinetic energy ( $k$ ) field in the parallel flow plane for the Real  $k$ - $\epsilon$  model at  $15^\circ$

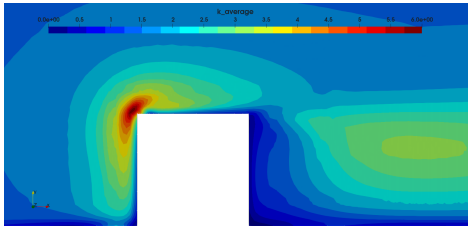

(c) Turbulent kinetic energy ( $k$ ) field in the parallel flow plane for the RNG  $k$ - $\epsilon$  model at  $15^\circ$

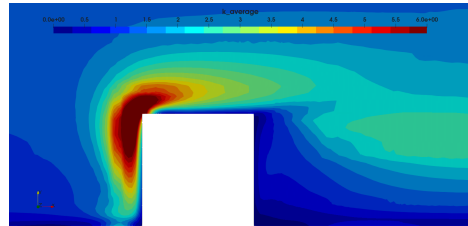

(d) Turbulent kinetic energy ( $k$ ) field in the parallel flow plane for the STD  $k$ - $\omega$  model at  $15^\circ$

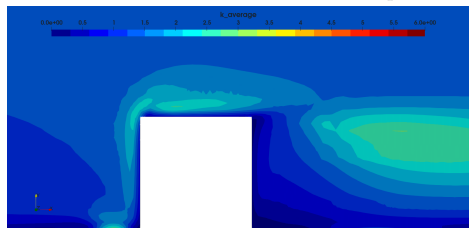

(e) Turbulent kinetic energy ( $k$ ) field in the parallel flow plane for the SST  $k$ - $\omega$  model at  $15^\circ$

Figure 67: Turbulent kinetic energy ( $k$ ) field in the parallel flow plane for tested turbulence models at  $15^\circ$

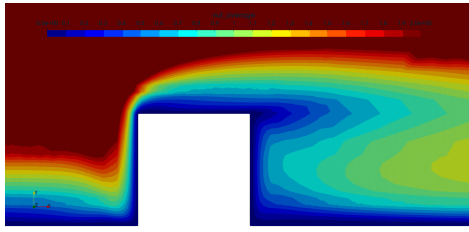

(a) Turbulent viscosity ( $\nu_t$ ) field in the parallel flow plane for the STD  $k-\epsilon$  model at  $15^\circ$

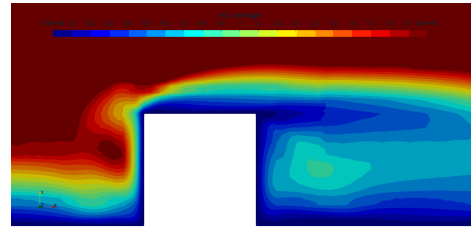

(b) Turbulent viscosity ( $\nu_t$ ) field in the parallel flow plane for the Realizable  $k-\epsilon$  model at  $15^\circ$

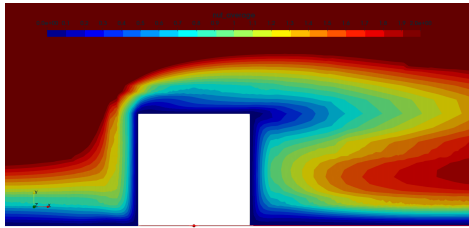

(c) Turbulent viscosity ( $\nu_t$ ) field in the parallel flow plane for the RNG  $k-\epsilon$  model at  $15^\circ$

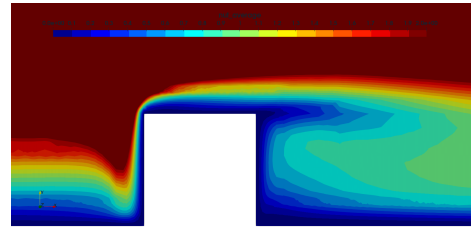

(d) Turbulent viscosity ( $\nu_t$ ) field in the parallel flow plane for the STD  $k-\omega$  model at  $15^\circ$

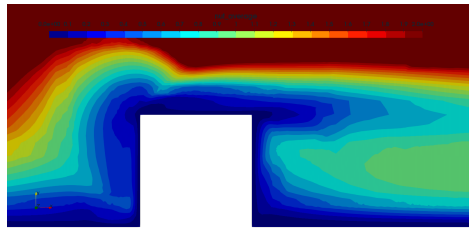

(e) Turbulent viscosity ( $\nu_t$ ) field in the parallel flow plane for the SST  $k-\omega$  model at  $15^\circ$

Figure 68: Turbulent viscosity ( $\nu_t$ ) field in the parallel flow plane for tested turbulence models at  $15^\circ$

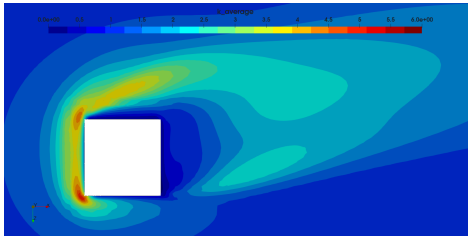

(a) Turbulent kinetic energy ( $k$ ) field in the cross-sectional plane for the STD  $k$ - $\epsilon$  model at  $15^\circ$

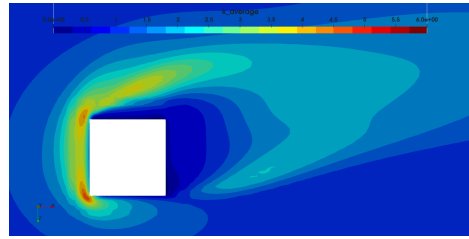

(b) Turbulent kinetic energy ( $k$ ) field in the cross-sectional plane for the Realizable  $k$ - $\epsilon$  model at  $15^\circ$

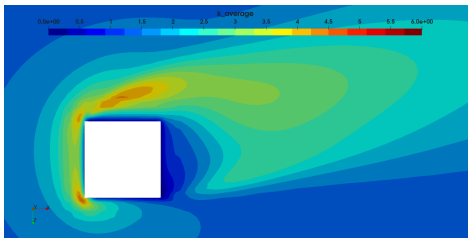

(c) Turbulent kinetic energy ( $k$ ) field in the cross-sectional plane for the RNG  $k$ - $\epsilon$  model at  $15^\circ$

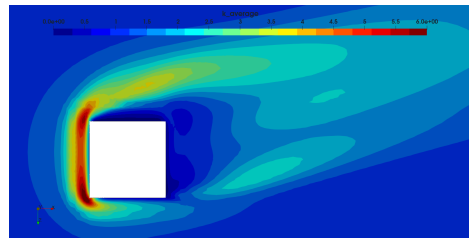

(d) Turbulent kinetic energy ( $k$ ) field in the cross-sectional plane for the STD  $k$ - $\omega$  model at  $15^\circ$

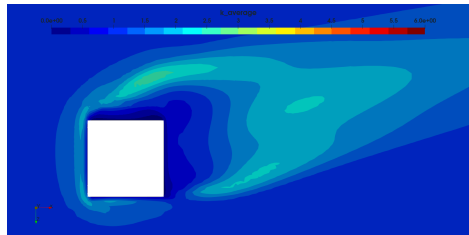

(e) Turbulent kinetic energy ( $k$ ) field in the cross-sectional plane for the SST  $k$ - $\omega$  model at  $15^\circ$

Figure 69: Cross-sectional turbulent kinetic energy ( $k$ ) field for tested turbulence models at  $15^\circ$

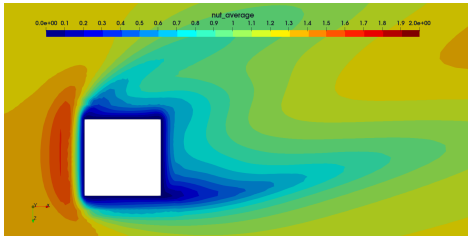

(a) Turbulent viscosity ( $\nu_t$ ) field in the cross-sectional plane for the STD  $k$ - $\epsilon$  model at  $15^\circ$

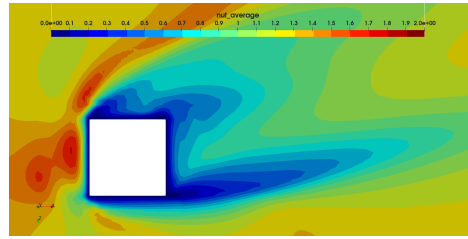

(b) Turbulent viscosity ( $\nu_t$ ) field in the cross-sectional plane for the Real  $k$ - $\epsilon$  model at  $15^\circ$

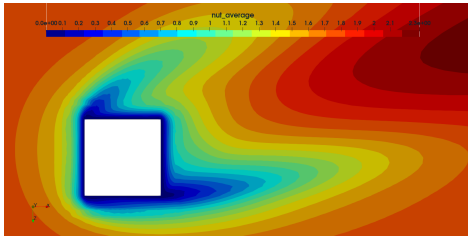

(c) Turbulent viscosity ( $\nu_t$ ) field in the cross-sectional plane for the RNG  $k$ - $\epsilon$  model at  $15^\circ$

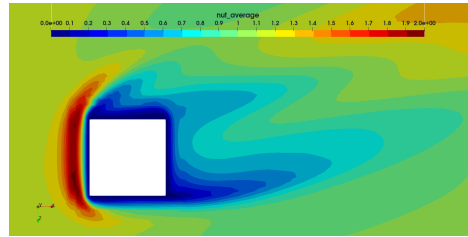

(d) Turbulent viscosity ( $\nu_t$ ) field in the cross-sectional plane for the STD  $k$ - $\omega$  model at  $15^\circ$

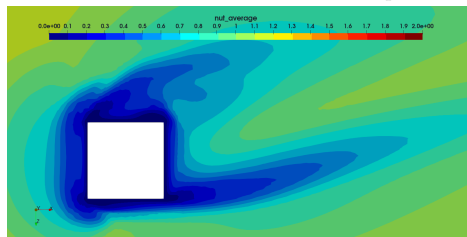

(e) Turbulent viscosity ( $\nu_t$ ) field in the cross-sectional plane for the SST  $k$ - $\omega$  model at  $15^\circ$

Figure 70: Cross-sectional turbulent viscosity ( $\nu_t$ ) field for tested turbulence models at  $15^\circ$

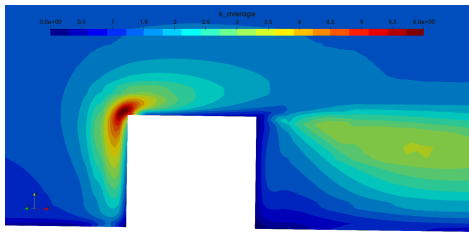

(a) Turbulent kinetic energy ( $k$ ) field in the parallel flow plane for the STD  $k$ - $\epsilon$  model at  $30^\circ$

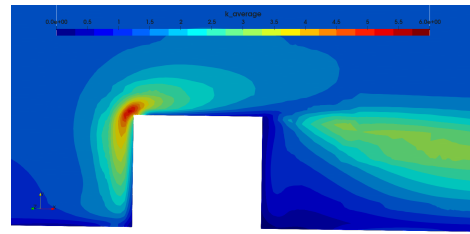

(b) Turbulent kinetic energy ( $k$ ) field in the parallel flow plane for the Real  $k$ - $\epsilon$  model at  $30^\circ$

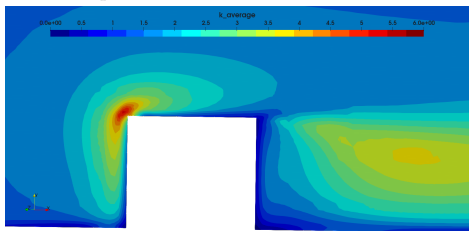

(c) Turbulent kinetic energy ( $k$ ) field in the parallel flow plane for the RNG  $k$ - $\epsilon$  model at  $30^\circ$

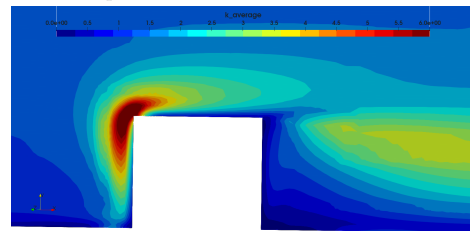

(d) Turbulent kinetic energy ( $k$ ) field in the parallel flow plane for the STD  $k$ - $\omega$  model at  $30^\circ$

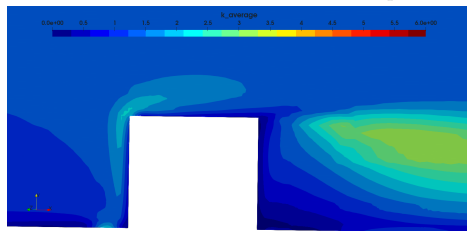

(e) Turbulent kinetic energy ( $k$ ) field in the parallel flow plane for the SST  $k$ - $\omega$  model at  $30^\circ$

Figure 71: Turbulent kinetic energy ( $k$ ) field in the parallel flow plane for tested turbulence models at  $30^\circ$

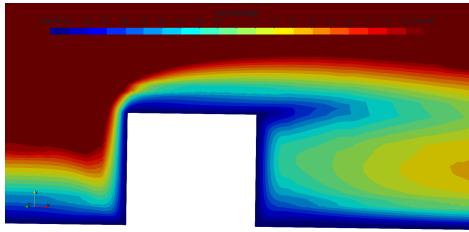

(a) Turbulent viscosity ( $\nu_t$ ) field in the parallel flow plane for the STD  $k-\epsilon$  model at  $30^\circ$

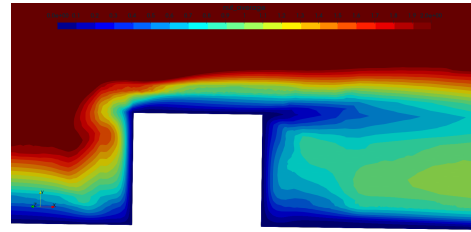

(b) Turbulent viscosity ( $\nu_t$ ) field in the parallel flow plane for the Realizable  $k-\epsilon$  model at  $30^\circ$

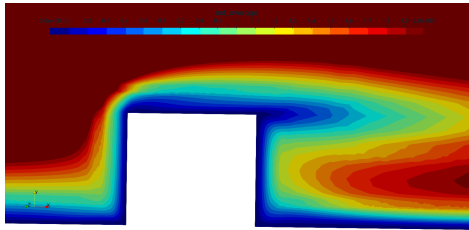

(c) Turbulent viscosity ( $\nu_t$ ) field in the parallel flow plane for the RNG  $k-\epsilon$  model at  $30^\circ$

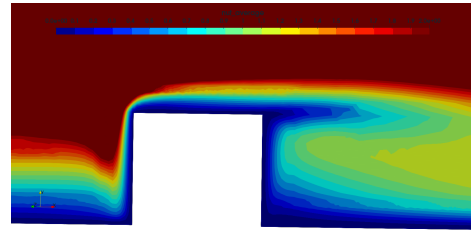

(d) Turbulent viscosity ( $\nu_t$ ) field in the parallel flow plane for the STD  $k-\omega$  model at  $30^\circ$

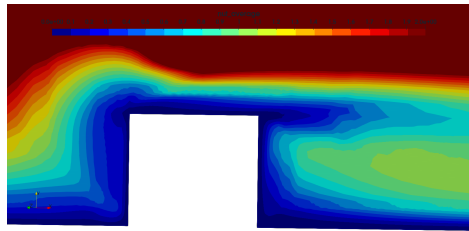

(e) Turbulent viscosity ( $\nu_t$ ) field in the parallel flow plane for the SST  $k-\omega$  model at  $30^\circ$

Figure 72: Turbulent viscosity ( $\nu_t$ ) field in the parallel flow plane for tested turbulence models at  $30^\circ$

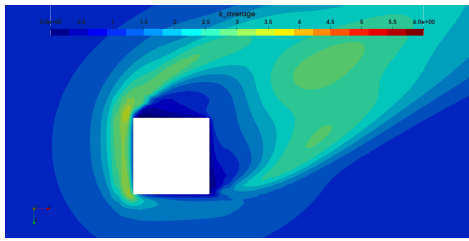

(a) Turbulent kinetic energy ( $k$ ) field in the cross-sectional plane for the STD  $k$ - $\epsilon$  model at  $30^\circ$

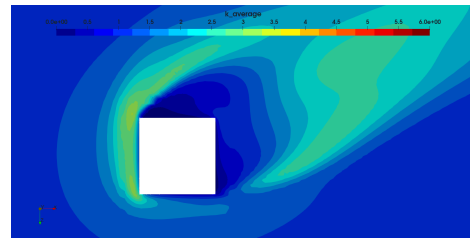

(b) Turbulent kinetic energy ( $k$ ) field in the cross-sectional plane for the Realizable  $k$ - $\epsilon$  model at  $30^\circ$

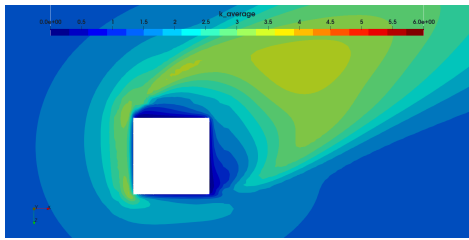

(c) Turbulent kinetic energy ( $k$ ) field in the cross-sectional plane for the RNG  $k$ - $\epsilon$  model at  $30^\circ$

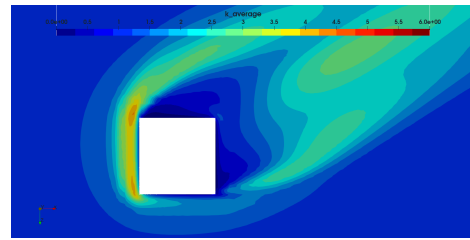

(d) Turbulent kinetic energy ( $k$ ) field in the cross-sectional plane for the STD  $k$ - $\omega$  model at  $30^\circ$

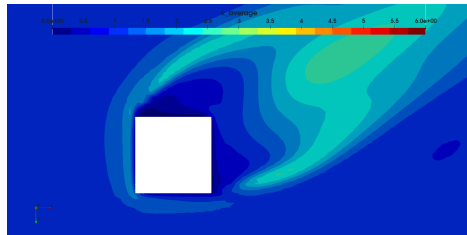

(e) Turbulent kinetic energy ( $k$ ) field in the cross-sectional plane for the SST  $k$ - $\omega$  model at  $30^\circ$

Figure 73: Cross-sectional turbulent kinetic energy ( $k$ ) field for tested turbulence models at  $30^\circ$

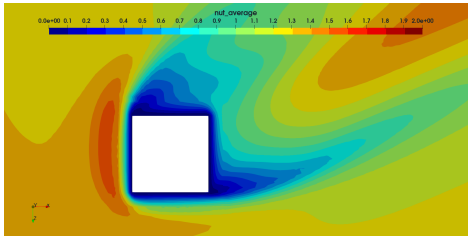

(a) Turbulent viscosity ( $\nu_t$ ) field in the cross-sectional plane for the STD  $k-\epsilon$  model at  $30^\circ$

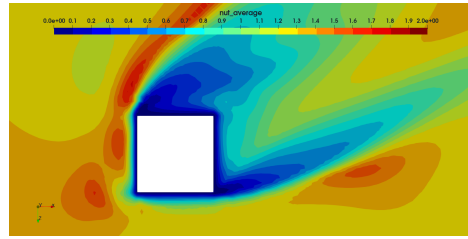

(b) Turbulent viscosity ( $\nu_t$ ) field in the cross-sectional plane for the Real  $k-\epsilon$  model at  $30^\circ$

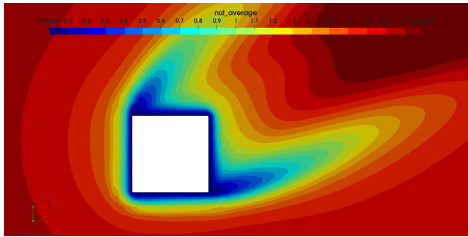

(c) Turbulent viscosity ( $\nu_t$ ) field in the cross-sectional plane for the RNG  $k-\epsilon$  model at  $30^\circ$

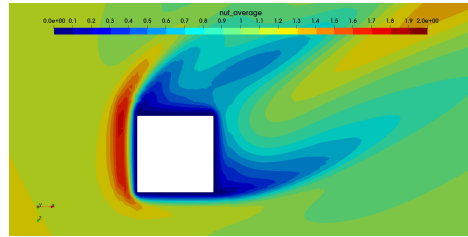

(d) Turbulent viscosity ( $\nu_t$ ) field in the cross-sectional plane for the STD  $k-\omega$  model at  $30^\circ$

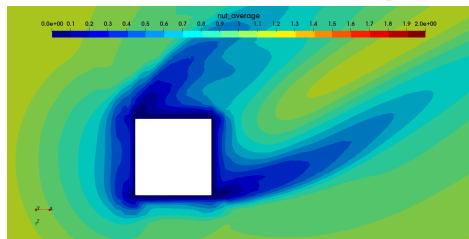

(e) Turbulent viscosity ( $\nu_t$ ) field in the cross-sectional plane for the SST  $k-\omega$  model at  $30^\circ$

Figure 74: Cross-sectional turbulent viscosity ( $\nu_t$ ) field for tested turbulence models at  $30^\circ$

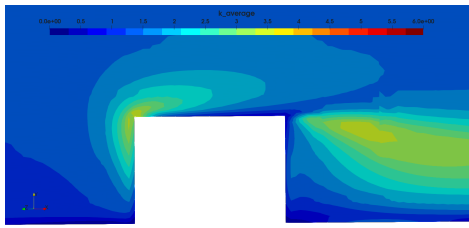

(a) Turbulent kinetic energy ( $k$ ) field in the parallel flow plane for the STD  $k$ - $\epsilon$  model at  $45^\circ$

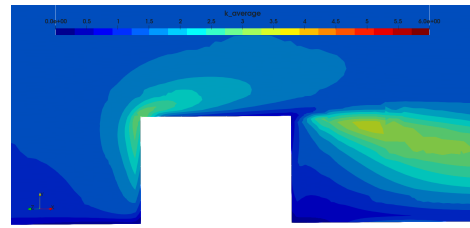

(b) Turbulent kinetic energy ( $k$ ) field in the parallel flow plane for the Real  $k$ - $\epsilon$  model at  $45^\circ$

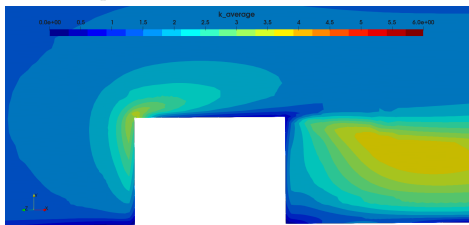

(c) Turbulent kinetic energy ( $k$ ) field in the parallel flow plane for the RNG  $k$ - $\epsilon$  model at  $45^\circ$

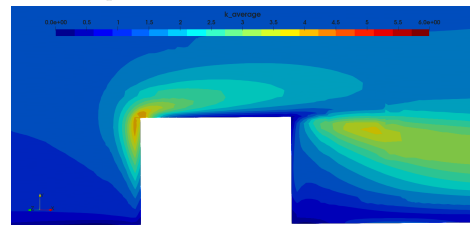

(d) Turbulent kinetic energy ( $k$ ) field in the parallel flow plane for the STD  $k$ - $\omega$  model at  $45^\circ$

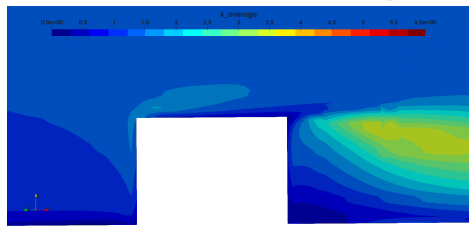

(e) Turbulent kinetic energy ( $k$ ) field in the parallel flow plane for the SST  $k$ - $\omega$  model at  $45^\circ$

Figure 75: Turbulent kinetic energy ( $k$ ) field in the parallel flow plane for tested turbulence models at  $45^\circ$

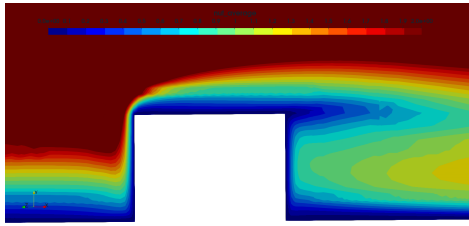

(a) Turbulent viscosity ( $\nu_t$ ) field in the parallel flow plane for the STD  $k-\epsilon$  model at 45°

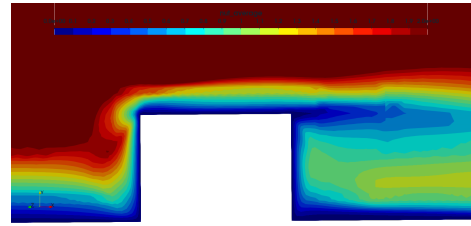

(b) Turbulent viscosity ( $\nu_t$ ) field in the parallel flow plane for the Realizable  $k-\epsilon$  model at 45°

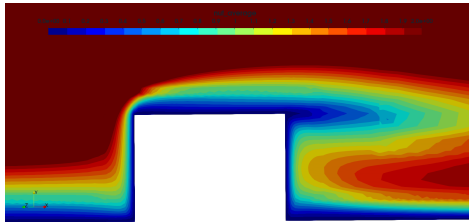

(c) Turbulent viscosity ( $\nu_t$ ) field in the parallel flow plane for the RNG  $k-\epsilon$  model at 45°

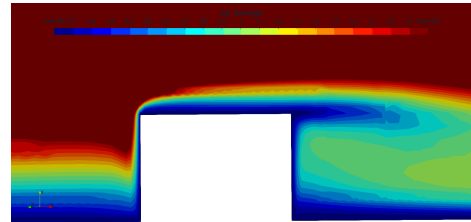

(d) Turbulent viscosity ( $\nu_t$ ) field in the parallel flow plane for the STD  $k-\omega$  model at 45°

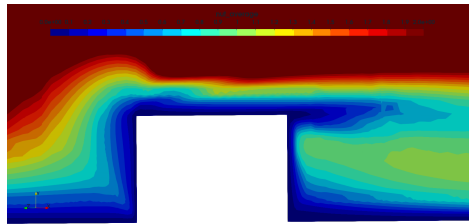

(e) Turbulent viscosity ( $\nu_t$ ) field in the parallel flow plane for the SST  $k-\omega$  model at 45°

Figure 76: Turbulent viscosity ( $\nu_t$ ) field in the parallel flow plane for tested turbulence models at 45°

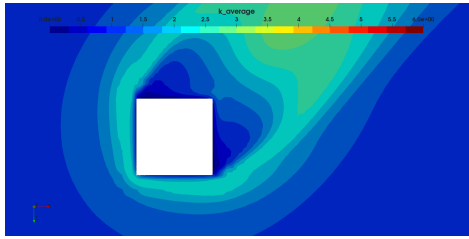

(a) Turbulent kinetic energy ( $k$ ) field in the cross-sectional plane for the STD  $k$ - $\epsilon$  model at  $45^\circ$

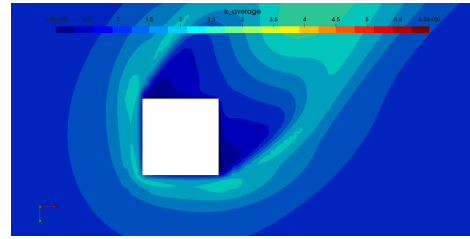

(b) Turbulent kinetic energy ( $k$ ) field in the cross-sectional plane for the Realizable  $k$ - $\epsilon$  model at  $45^\circ$

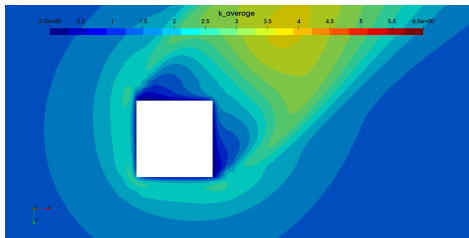

(c) Turbulent kinetic energy ( $k$ ) field in the cross-sectional plane for the RNG  $k$ - $\epsilon$  model at  $45^\circ$

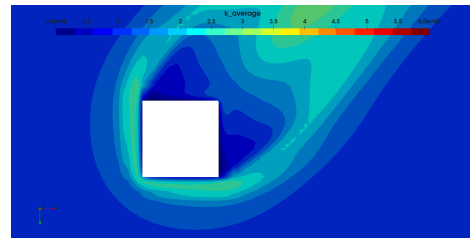

(d) Turbulent kinetic energy ( $k$ ) field in the cross-sectional plane for the STD  $k$ - $\omega$  model at  $45^\circ$

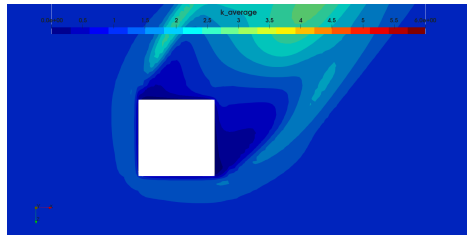

(e) Turbulent kinetic energy ( $k$ ) field in the cross-sectional plane for the SST  $k$ - $\omega$  model at  $45^\circ$

Figure 77: Cross-sectional turbulent kinetic energy ( $k$ ) field for tested turbulence models at  $45^\circ$

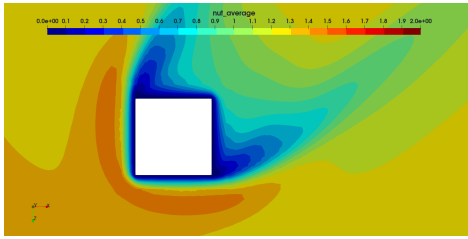

(a) Turbulent viscosity ( $\nu_t$ ) field in the cross-sectional plane for the STD  $k-\epsilon$  model at 45°

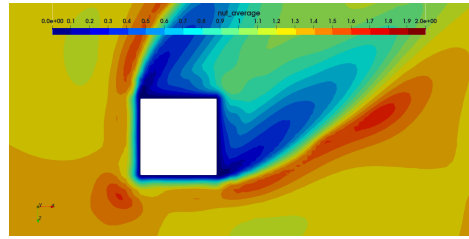

(b) Turbulent viscosity ( $\nu_t$ ) field in the cross-sectional plane for the Real  $k-\epsilon$  model at 45°

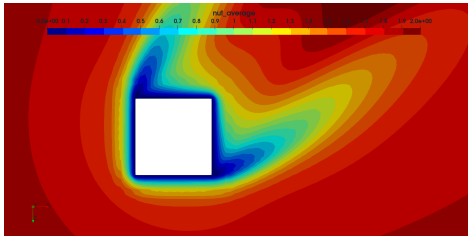

(c) Turbulent viscosity ( $\nu_t$ ) field in the cross-sectional plane for the RNG  $k-\epsilon$  model at 45°

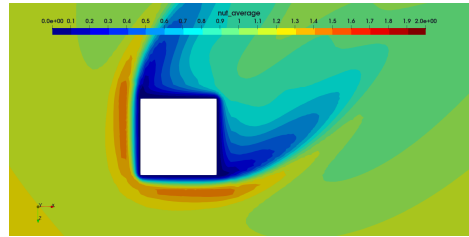

(d) Turbulent viscosity ( $\nu_t$ ) field in the cross-sectional plane for the STD  $k-\omega$  model at 45°

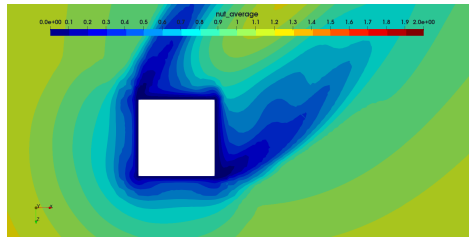

(e) Turbulent viscosity ( $\nu_t$ ) field in the cross-sectional plane for the SST  $k-\omega$  model at 45°

Figure 78: Cross-sectional turbulent viscosity ( $\nu_t$ ) field for tested turbulence models at 45°

## 2.6. Stream-lines

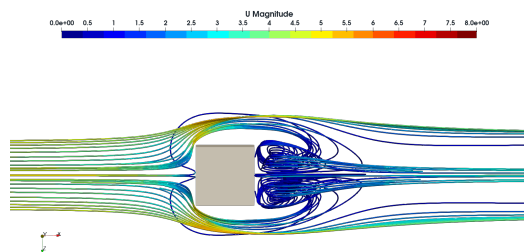

(a) U stream-lines, STD  $k-\epsilon$ , at  $0^\circ$

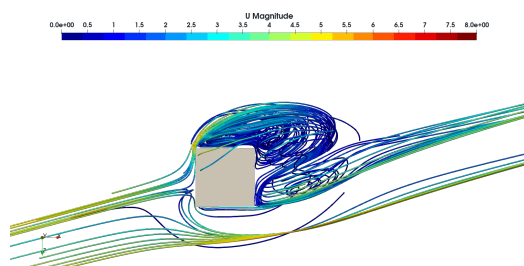

(b) U stream-lines, STD  $k-\epsilon$ , at  $15^\circ$

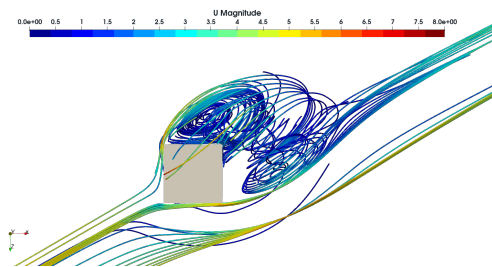

(c) U stream-lines, STD  $k-\epsilon$ , at  $30^\circ$

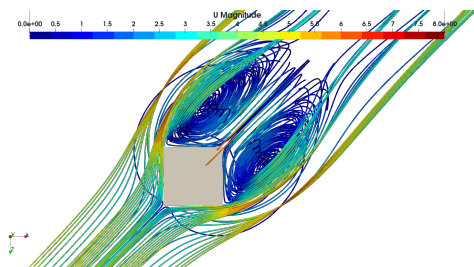

(d) U stream-lines, STD  $k-\epsilon$ , at  $45^\circ$

Figure 79: U stream-lines, STD  $k-\epsilon$

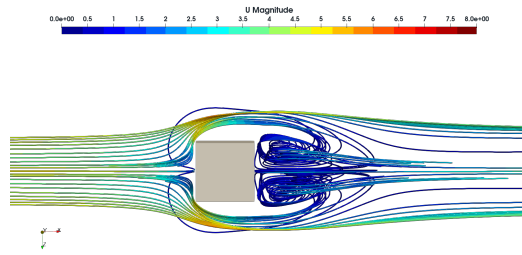

(a) U stream-lines, Realizable  $k-\epsilon$ , at  $0^\circ$

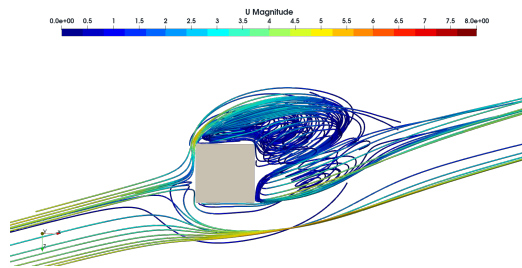

(b) U stream-lines, Realizable  $k-\epsilon$ , at  $15^\circ$

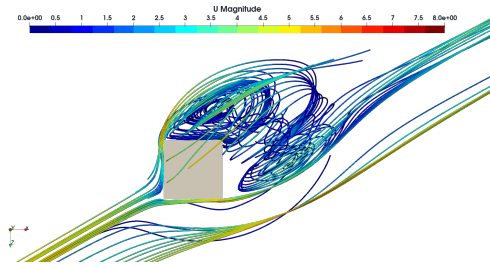

(c) U stream-lines, Realizable  $k-\epsilon$ , at  $30^\circ$

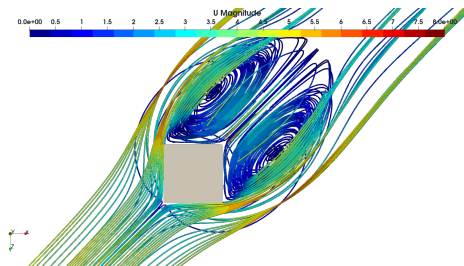

(d) U stream-lines, Realizable  $k-\epsilon$ , at  $45^\circ$

Figure 80: U stream-lines, Realizable  $k-\epsilon$

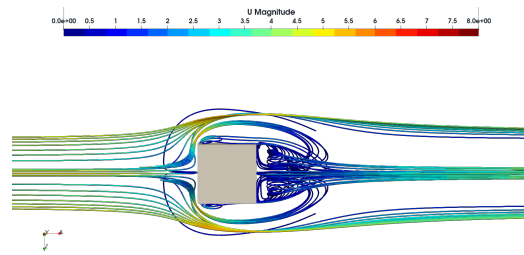

(a) U stream-lines, RNG  $k-\epsilon$ , at  $0^\circ$

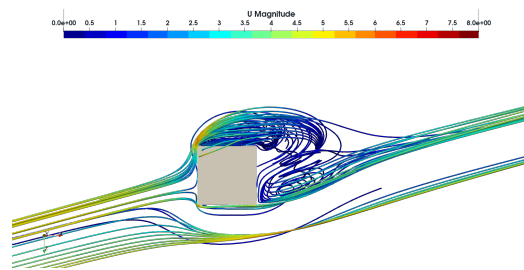

(b) U stream-lines, RNG  $k-\epsilon$ , at  $15^\circ$

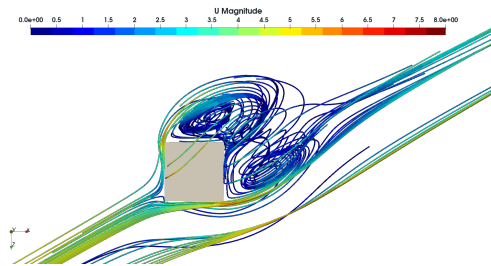

(c) U stream-lines, RNG  $k-\epsilon$ , at  $30^\circ$

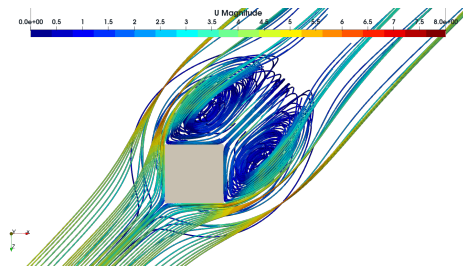

(d) U stream-lines, RNG  $k-\epsilon$ , at  $45^\circ$

Figure 81: U stream-lines, RNG  $k-\epsilon$

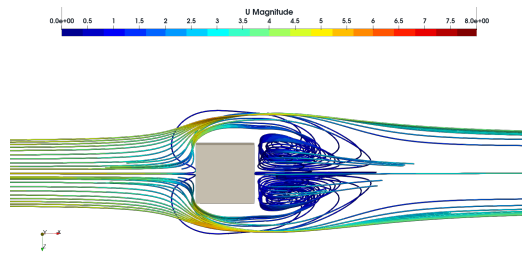

(a) U stream-lines, STD  $k-\omega$ , at  $0^\circ$

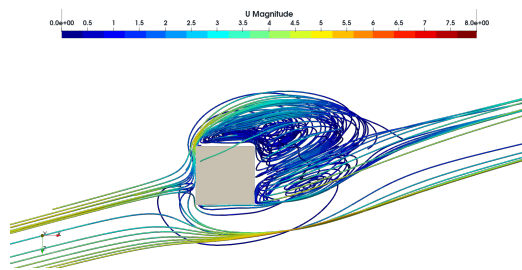

(b) U stream-lines, STD  $k-\omega$ , at  $15^\circ$

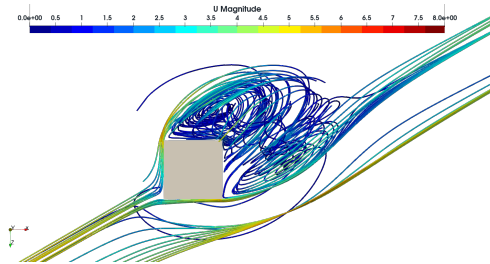

(c) U stream-lines, STD  $k-\omega$ , at  $30^\circ$

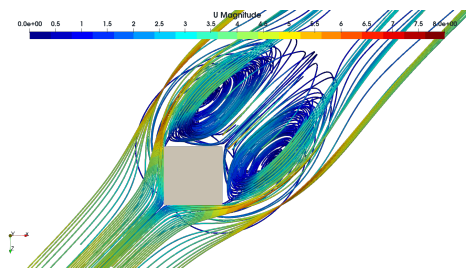

(d) U stream-lines, STD  $k-\omega$ , at  $45^\circ$

Figure 82: U stream-lines, STD  $k-\omega$

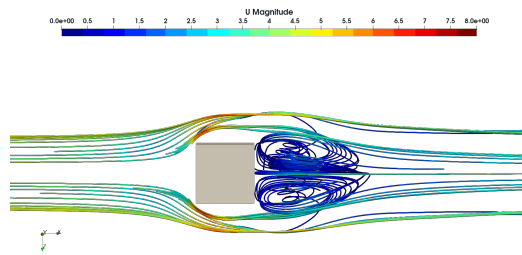

(a) U stream-lines, SST  $k-\omega$ , at  $0^\circ$

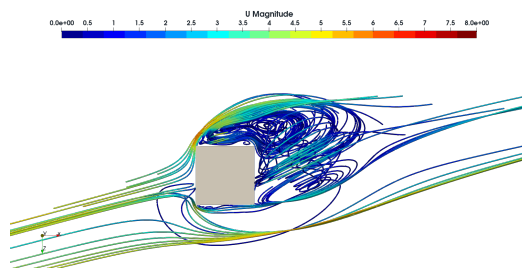

(b) U stream-lines, SST  $k-\omega$ , at  $15^\circ$

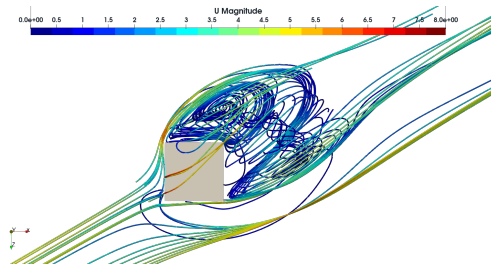

(c) U stream-lines, SST  $k-\omega$ , at  $30^\circ$

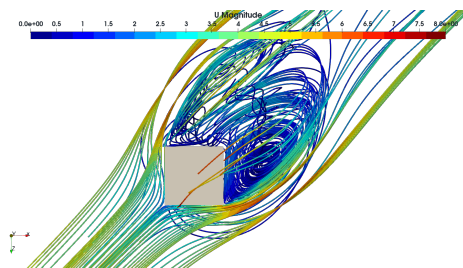

(d) U stream-lines, SST  $k-\omega$ , at  $45^\circ$

Figure 83: U stream-lines, SST  $k-\omega$

### **3. Acknowledgements.**

The author acknowledges the financial support provided by the Secretaría de Ciencia, Humanidades, Tecnología e Innovación (SECIHTI, México) through a doctoral scholarship, which funded the author's full period of doctoral studies. This support is gratefully appreciated and contributed significantly to the completion of the research reported in this electronic supplementary material.
